# Supplementary material
Source: bioRxiv or medRxiv preprint supplement (https://medrxiv.org/highwire/filestream/95390/field_highwire_adjunct_files/2/2020.09.01.20185603-3.pdf)
Supplement: Supplementary file [file 2020.09.01.20185603-3.pdf]

**Supplementary Data 2-1 Results from competitive pathway enrichment analysis based on genome-wide summary-level data of hsGWAS.**

| Gene Set                        | Size | Count | z-score | p-value  | q-value  | List of Genes                                                                                                                                                                                                                                                                                                                                                                                                                                                                                                                                                                                                                                                                                                                                             |
|---------------------------------|------|-------|---------|----------|----------|-----------------------------------------------------------------------------------------------------------------------------------------------------------------------------------------------------------------------------------------------------------------------------------------------------------------------------------------------------------------------------------------------------------------------------------------------------------------------------------------------------------------------------------------------------------------------------------------------------------------------------------------------------------------------------------------------------------------------------------------------------------|
| KEGG_ALLOGRAFT_REJECTION        | 38   | 36    | 12.6476 | 0.00E+00 | 0.00E+00 | HLA-DRB5(4.11028); IL2(3.62922); HLA-E(3.27708); HLA-G(3.2749); HLA-DQA2(3.16347); HLA-DRA(3.14994); HLA-DOB(3.11438); HLA-DMB(3.09917); HLA-DMA(3.09615); TNF(3.09414); HLA-DPB1(3.03922); HLA-DPA1(3.0355); HLA-A(3.02312); HLA-C(2.98835); HLA-DQB1(2.97025); HLA-B(2.95626); HLA-DQA1(2.94591); HLA-F(2.83254); HLA-DRB1(2.76738); HLA-DOA(2.72508); IFNG(1.74523); PRF1(1.46483); FASLG(1.10083); FAS(0.923795); HLA-DRB3(0.760622); CD80(0.436654); IL4(0.324564); CD40(0.271072); HLA-DRB4(0.0708609); IL12A(0.0685942); IL5(0.0659333); CD86(0.049911); CD28(-0.16103); IL10(-0.165903); IL12B(-0.245281); GZMB(-0.268581);                                                                                                                       |
| KEGG_GRAFT_VERSUS_HOS_T_DISEASE | 42   | 37    | 12.6129 | 0.00E+00 | 0.00E+00 | HLA-DRB5(4.11028); IL2(3.62922); HLA-E(3.27708); HLA-G(3.2749); HLA-DQA2(3.16347); HLA-DRA(3.14994); HLA-DOB(3.11438); HLA-DMB(3.09917); HLA-DMA(3.09615); TNF(3.09414); HLA-DPB1(3.03922); HLA-DPA1(3.0355); HLA-A(3.02312); HLA-C(2.98835); HLA-DQB1(2.97025); HLA-B(2.95626); HLA-DQA1(2.94591); HLA-F(2.83254); HLA-DRB1(2.76738); HLA-DOA(2.72508); IL6(1.94139); IFNG(1.74523); PRF1(1.46483); FASLG(1.10083); FAS(0.923795); HLA-DRB3(0.760622); CD80(0.436654); IL1A(0.402186); KLRD1(0.29064); KIR3DL1(0.157683); HLA-DRB4(0.0708609); CD86(0.049911); CD28(-0.16103); GZMB(-0.268581); IL1B(-0.388308); KLRC1(-0.466394); KIR3DL2(-0.786806);                                                                                                   |
| KEGG_TYPE_I_DIABETES_MELLITUS   | 44   | 43    | 12.0019 | 0.00E+00 | 0.00E+00 | HLA-DRB5(4.11028); IL2(3.62922); HLA-E(3.27708); HLA-G(3.2749); HLA-DQA2(3.16347); HLA-DRA(3.14994); HLA-DOB(3.11438); HLA-DMB(3.09917); HLA-DMA(3.09615); TNF(3.09414); LTA(3.08913); HLA-DPB1(3.03922); HLA-DPA1(3.0355); HLA-A(3.02312); HLA-C(2.98835); HLA-DQB1(2.97025); HLA-B(2.95626); HLA-DQA1(2.94591); HLA-F(2.83254); HLA-DRB1(2.76738); HLA-DOA(2.72508); IFNG(1.74523); PRF1(1.46483); FASLG(1.10083); GAD1(0.975717); FAS(0.923795); HLA-DRB3(0.760622); ICA1(0.752093); CD80(0.436654); HSPD1(0.404551); IL1A(0.402186); PTPRN2(0.388508); HLA-DRB4(0.0708609); IL12A(0.0685942); CD86(0.049911); CPE(-0.0572665); CD28(-0.16103); IL12B(-0.245281); GZMB(-0.268581); IL1B(-0.388308); GAD2(-0.416458); INS(-0.642122); PTPRN(-0.757008); |

|                                          |    |    |         |          |          |                                                                                                                                                                                                                                                                                                                                                                                                                                                                                                                                                                                                                                                                                                                                                                                                                                                                                                                                                                                                                                                                                                                                                                                                                                                                                                                                                                                                                                                      |
|------------------------------------------|----|----|---------|----------|----------|------------------------------------------------------------------------------------------------------------------------------------------------------------------------------------------------------------------------------------------------------------------------------------------------------------------------------------------------------------------------------------------------------------------------------------------------------------------------------------------------------------------------------------------------------------------------------------------------------------------------------------------------------------------------------------------------------------------------------------------------------------------------------------------------------------------------------------------------------------------------------------------------------------------------------------------------------------------------------------------------------------------------------------------------------------------------------------------------------------------------------------------------------------------------------------------------------------------------------------------------------------------------------------------------------------------------------------------------------------------------------------------------------------------------------------------------------|
| KEGG_AUTOIMMUNE_THYROID_DISEASE          | 53 | 51 | 11.9818 | 0.00E+00 | 0.00E+00 | HLA-DRB5(4.11028); IL2(3.62922); HLA-E(3.27708); HLA-G(3.2749); HLA-DQA2(3.16347); HLA-DRA(3.14994); HLA-DOB(3.11438); HLA-DMB(3.09917); HLA-DMA(3.09615); HLA-DPB1(3.03922); HLA-DPA1(3.0355); HLA-A(3.02312); HLA-C(2.98835); HLA-DQB1(2.97025); HLA-B(2.95626); HLA-DQA1(2.94591); HLA-F(2.83254); HLA-DRB1(2.76738); HLA-DOA(2.72508); IFNA1(2.57774); IFNA17(1.64472); IFNA7(1.62659); IFNA10(1.62315); IFNA16(1.61427); PRF1(1.46483); IFNA14(1.46285); TSHB(1.42533); IFNA13(1.4019); IFNA6(1.3785); FASLG(1.10083); FAS(0.923795); IFNA8(0.870525); HLA-DRB3(0.760622); CD80(0.436654); IL4(0.324564); IFNA21(0.297396); CD40(0.271072); CTLA4(0.235469); IFNA4(0.226331); IFNA2(0.151927); HLA-DRB4(0.0708609); IL5(0.0659333); CD86(0.049911); TPO(-0.0662216); IFNA5(-0.102715); TG(-0.153394); CD28(-0.16103); IL10(-0.165903); GZMB(-0.268581); CGA(-0.403254); TSHR(-1.08937);                                                                                                                                                                                                                                                                                                                                                                                                                                                                                                                                                         |
| KEGG_ANTIGEN_PROCESSING_AND_PRESENTATION | 89 | 80 | 10.3794 | 0.00E+00 | 0.00E+00 | HLA-DRB5(4.11028); HSPA1B(3.36842); HSPA1A(3.3411); HSPA1L(3.30303); HLA-E(3.27708); HLA-G(3.2749); HLA-DQA2(3.16347); HLA-DRA(3.14994); HLA-DOB(3.11438); HLA-DMB(3.09917); HLA-DMA(3.09615); LTA(3.08913); HLA-DPB1(3.03922); HLA-DPA1(3.0355); HLA-A(3.02312); TAP1(2.99505); HLA-C(2.98835); HLA-DQB1(2.97025); HLA-B(2.95626); HLA-DQA1(2.94591); TAP2(2.93098); HLA-F(2.83254); HLA-DRB1(2.76738); HLA-DOA(2.72508); IFNA1(2.57774); IFNA17(1.64472); IFNA7(1.62659); IFNA10(1.62315); IFNA16(1.61427); TAPBP(1.53511); IFNA14(1.46285); IFNA13(1.4019); IFNA6(1.3785); IFI30(1.11839); IFNA8(0.870525); HSPA6(0.860512); HLA-DRB3(0.760622); LGMN(0.751155); RFX5(0.731158); CTSS(0.725716); HSPA4(0.673791); HSPA5(0.578858); NFYB(0.53654); HSPA2(0.427194); IFNA21(0.297396); KLRD1(0.29064); IFNA4(0.226331); KIR2DL4(0.178735); KIR3DL1(0.157683); IFNA2(0.151927); HLA-DRB4(0.0708609); CANX(-0.00786418); PSME3(-0.0268547); HSPA8(-0.0426388); PSME2(-0.0436557); RFXANK(-0.0511772); PSME1(-0.079645); IFNA5(-0.102715); CTSB(-0.128134); CIITA(-0.148118); RFXAP(-0.178394); NFYC(-0.287989); CREB1(-0.315765); PDIA3(-0.348713); CD74(-0.359131); CD8A(-0.391305); KLRC2(-0.405379); CALR(-0.437964); CD4(-0.44345); CD8B(-0.443911); KLRC1(-0.466394); KIR3DL3(-0.471068); B2M(-0.476766); KIR2DS4(-0.529479); KLRC4(-0.562774); KLRC3(-0.592427); HSP90AB1(-0.674748); HSP90AA1(-0.681845); KIR3DL2(-0.786806); NFYA(-0.833691); |

KEGG\_SYSTEMIC\_LUPUS\_ER 140 130 9.74006 0.00E+00 0.00E+00 HLA-DRB5(4.11028); HIST1H2AI(3.65052); HIST1H2BL(3.64688);  
YTHEMATOSUS HIST1H3H(3.64339); HIST1H2BM(3.33787); HIST1H2AJ(3.33787); HLA-  
DQA2(3.16347); HLA-DRA(3.14994); HLA-DOB(3.11438); HLA-DMB(3.09917);  
HLA-DMA(3.09615); TNF(3.09414); C2(3.05293); C4B(3.05007); C4A(3.05007);  
HLA-DPB1(3.03922); HLA-DPA1(3.0355); HLA-DQB1(2.97025); HLA-  
DQA1(2.94591); HLA-DRB1(2.76738); HLA-DOA(2.72508); H2AFY2(2.02561);  
HIST1H3J(2.00032); HIST1H2BO(1.99425); HIST1H2AM(1.99425); IFNG(1.74523);  
HIST1H2AG(1.66906); HIST1H2BJ(1.65621); HIST1H2AH(1.6501);  
HIST1H4I(1.61301); HIST1H2BK(1.56533); HIST1H2BN(1.48654);  
HIST1H4L(1.47987); HIST1H2AL(1.47987); HIST1H2AK(1.47651);  
HIST1H3I(1.47623); HIST1H4J(1.34966); HIST1H4K(1.34164); C9(1.18727);  
C6(1.1118); C1S(1.09855); HIST1H4D(1.03022); HIST1H2BG(1.01864);  
HIST1H2AE(1.01701); HIST1H2AD(1.00268); HIST1H2BF(0.999573);  
C8G(0.999052); HIST1H3D(0.998028); C1R(0.997817); HIST1H4E(0.996491);  
HIST1H2BD(0.969877); ACTN2(0.962041); HIST1H4C(0.940817);  
HIST1H2BE(0.886607); FCGR2B(0.823869); FCGR2A(0.817765);  
H3F3A(0.794914); GRIN2B(0.790131); HLA-DRB3(0.760622);  
HIST1H2BA(0.742792); HIST1H2AA(0.739847); HIST1H3C(0.718367);  
HIST1H2BB(0.718367); HIST1H4B(0.706147); HIST1H2AB(0.704646);  
HIST1H3B(0.701784); HIST1H2AC(0.586216); HIST1H2BC(0.578733);  
HIST1H4H(0.572592); H2AFY(0.536314); FCGR3B(0.471305); CD80(0.436654);  
H2AFJ(0.429568); HIST4H4(0.427884); FCGR2C(0.401133); ACTN4(0.360653);  
C5(0.360513); CD40(0.271072); GRIN2A(0.262373); H2AFZ(0.20518);  
H2AFX(0.153526); ACTN1(0.0709246); HLA-DRB4(0.0708609); SSB(0.070463);  
HIST1H3G(0.0698672); HIST1H2BI(0.0604719); CD86(0.049911);  
TROVE2(0.0439053); C3(0.0236471); HIST1H3F(-0.00841189); HIST1H4G(-  
0.00841189); HIST1H2BH(-0.00963075); HIST1H3E(-0.0205535); ACTN3(-  
0.034746); H2AFV(-0.0819867); HIST1H4F(-0.133493); CD28(-0.16103); IL10(-  
0.165903); HIST3H2BB(-0.174075); HIST3H2A(-0.174075); HIST3H3(-0.174075);

|                                                       |    |    |         |          |          |                                                                                                                                                                                                                                                                                                                                                                                                                                                                                                                                                                                                                                                                                                                                                                                                                                                                                                                                                                                                                                                                                                                                                                                                            |
|-------------------------------------------------------|----|----|---------|----------|----------|------------------------------------------------------------------------------------------------------------------------------------------------------------------------------------------------------------------------------------------------------------------------------------------------------------------------------------------------------------------------------------------------------------------------------------------------------------------------------------------------------------------------------------------------------------------------------------------------------------------------------------------------------------------------------------------------------------------------------------------------------------------------------------------------------------------------------------------------------------------------------------------------------------------------------------------------------------------------------------------------------------------------------------------------------------------------------------------------------------------------------------------------------------------------------------------------------------|
| KEGG_VIRAL_MYOCARDITIS                                | 73 | 68 | 8.21851 | 0.00E+00 | 0.00E+00 | HLA-DRB5(4.11028); HLA-E(3.27708); HLA-G(3.2749); HLA-DQA2(3.16347); HLA-DRA(3.14994); HLA-DOB(3.11438); HLA-DMB(3.09917); HLA-DMA(3.09615); HLA-DPB1(3.03922); HLA-DPA1(3.0355); HLA-A(3.02312); HLA-C(2.98835); HLA-DQB1(2.97025); HLA-B(2.95626); HLA-DQA1(2.94591); HLA-F(2.83254); LAMA2(2.79088); HLA-DRB1(2.76738); HLA-DOA(2.72508); ICAM1(2.37149); MYH14(2.15065); EIF4G2(1.86535); PRF1(1.46483); ABL1(1.23708); ITGB2(1.12695); EIF4G1(1.10593); SGCD(1.09625); RAC3(0.881826); CASP9(0.79633); HLA-DRB3(0.760622); SGCB(0.698544); RAC2(0.563748); MYH9(0.518042); CYCS(0.504235); ITGAL(0.494027); CD80(0.436654); DAG1(0.358283); CD40(0.271072); MYH13(0.179219); MYH11(0.129008); HLA-DRB4(0.0708609); CD86(0.049911); CAV1(-0.0447534); MYH6(-0.0488321); CXADR(-0.0676558); MYH1(-0.0678804); MYH2(-0.102955); CD28(-0.16103); MYH10(-0.21898); FYN(-0.241479); ACTB(-0.251508); MYH7(-0.293116); MYH3(-0.332542); ABL2(-0.340488); CD55(-0.388429); CCND1(-0.401944); SGCG(-0.517643); CASP3(-0.541075); BID(-0.589717); CASP8(-0.598201); MYH8(-0.602901); MYH4(-0.670849); MYH15(-0.683912); EIF4G3(-0.722139); MYH7B(-0.761638); SGCA(-0.830816); RAC1(-0.871829); ACTG1(-1.26763); |
| KEGG_ASTHMA                                           | 30 | 29 | 8.05361 | 0.00E+00 | 0.00E+00 | HLA-DRB5(4.11028); HLA-DQA2(3.16347); HLA-DRA(3.14994); HLA-DOB(3.11438); HLA-DMB(3.09917); HLA-DMA(3.09615); TNF(3.09414); HLA-DPB1(3.03922); HLA-DPA1(3.0355); HLA-DQB1(2.97025); HLA-DQA1(2.94591); HLA-DRB1(2.76738); HLA-DOA(2.72508); IL9(0.88924); HLA-DRB3(0.760622); IL13(0.436581); IL4(0.324564); CD40(0.271072); RNASE3(0.159919); HLA-DRB4(0.0708609); IL5(0.0659333); FCER1A(-0.124279); PRG2(-0.134005); IL10(-0.165903); CCL11(-0.33936); IL3(-0.347172); FCER1G(-0.449948); EPX(-0.508371); MS4A2(-0.867899);                                                                                                                                                                                                                                                                                                                                                                                                                                                                                                                                                                                                                                                                             |
| KEGG_INTESTINAL_IMMUNE_NETWORK_FOR_I<br>GA_PRODUCTION | 48 | 47 | 7.58457 | 1.65E-14 | 2.29E-12 | HLA-DRB5(4.11028); IL2(3.62922); HLA-DQA2(3.16347); HLA-DRA(3.14994); HLA-DOB(3.11438); HLA-DMB(3.09917); HLA-DMA(3.09615); HLA-DPB1(3.03922); HLA-DPA1(3.0355); HLA-DQB1(2.97025); HLA-DQA1(2.94591); HLA-DRB1(2.76738); HLA-DOA(2.72508); IL6(1.94139); ITGA4(1.44516); MAP3K14(1.30259); CCR9(1.22105); IL15RA(1.1474); HLA-DRB3(0.760622); TNFRSF17(0.648255); ITGB7(0.641235); LTBR(0.629883); CXCL12(0.576547); CD80(0.436654); IL15(0.401945); ICOSLG(0.38944); IL4(0.324564); CD40(0.271072); TNFRSF13B(0.134187); HLA-DRB4(0.0708609); IL5(0.0659333); CD86(0.049911); TNFSF13(0.0381369); ICOS(-0.029109); TNFRSF13C(-0.0470145); TGFB1(-0.0624259); CCL27(-0.06631); CD28(-0.16103); IL10(-0.165903); MADCAM1(-0.215493); AICDA(-0.228457); CCR10(-0.298206); CCL25(-0.310412); TNFSF13B(-0.330192); CXCR4(-0.338466); CCL28(-0.446852); PIGR(-0.736478);                                                                                                                                                                                                                                                                                                                                       |

|                      |    |    |         |          |          |                                                                                                                                                                                                                                                                                                                                                                                                                                                                                                                                                                                                                                                                                                                                                                                                                                                                                                                                                                                       |
|----------------------|----|----|---------|----------|----------|---------------------------------------------------------------------------------------------------------------------------------------------------------------------------------------------------------------------------------------------------------------------------------------------------------------------------------------------------------------------------------------------------------------------------------------------------------------------------------------------------------------------------------------------------------------------------------------------------------------------------------------------------------------------------------------------------------------------------------------------------------------------------------------------------------------------------------------------------------------------------------------------------------------------------------------------------------------------------------------|
| REACTOME_INTERFERON_ | 63 | 59 | 6.87752 | 3.04E-12 | 3.80E-10 | HLA-DRB5(4.11028); IRF4(3.50609); HLA-G(3.2749); HLA-DQA2(3.16347); HLA-DPB1(3.03922); HLA-DPA1(3.0355); HLA-A(3.02312); HLA-C(2.98835); HLA-B(2.95626); HLA-DQA1(2.94591); HLA-F(2.83254); HLA-DRB1(2.76738); ICAM1(2.37149); PIAS1(2.14783); IFNG(1.74523); SOCS1(1.64266); GBP6(1.62604); JAK2(1.45502); CAMK2A(1.24873); GBP4(1.19154); IRF3(1.16083); GBP7(1.08423); CD44(0.94238); HLA-DRB3(0.760622); IRF6(0.6515); OASL(0.47695); SUMO1(0.457212); JAK1(0.383449); CAMK2D(0.366921); VCAM1(0.355924); STAT1(0.352575); IRF8(0.327062); GBP5(0.233135); CAMK2B(0.223172); GBP1(0.221186); GBP2(0.164722); SOCS3(0.139116); PRKCD(0.111022); IFNGR2(0.105199); IRF1(0.0352381); PTPN2(-0.015229); IRF9(-0.0949597); IRF5(-0.103255); CIITA(-0.148118); SP100(-0.255957); IRF2(-0.26298); PML(-0.313604); NCAM1(-0.353834); IRF7(-0.362392); PTPN6(-0.471003); B2M(-0.476766); OAS1(-0.487347); IFNGR1(-0.489543); FCGR1A(-0.500218); PTPN1(-0.537427); PTAFR(-0.551427); OAS3(- |
|----------------------|----|----|---------|----------|----------|---------------------------------------------------------------------------------------------------------------------------------------------------------------------------------------------------------------------------------------------------------------------------------------------------------------------------------------------------------------------------------------------------------------------------------------------------------------------------------------------------------------------------------------------------------------------------------------------------------------------------------------------------------------------------------------------------------------------------------------------------------------------------------------------------------------------------------------------------------------------------------------------------------------------------------------------------------------------------------------|

KEGG\_CELL\_ADHESION\_M 134 126 6.67747 1.22E-11 1.38E-09 HLA-DRB5(4.11028); NRXN2(3.47159); HLA-E(3.27708); HLA-G(3.2749); HLA-DQA2(3.16347); HLA-DRA(3.14994); HLA-DOB(3.11438); HLA-DMB(3.09917); HLA-DMA(3.09615); HLA-DPB1(3.03922); HLA-DPA1(3.0355); HLA-A(3.02312); HLA-C(2.98835); HLA-DQB1(2.97025); HLA-B(2.95626); HLA-DQA1(2.94591); NRCAM(2.93943); CNTN1(2.89714); NFASC(2.85099); HLA-F(2.83254); HLA-DRB1(2.76738); HLA-DOA(2.72508); ICAM1(2.37149); ICAM3(2.02248); CADM1(1.9423); CD34(1.92887); ITGAV(1.7391); ITGA4(1.44516); PTPRC(1.27284); NRXN3(1.19074); NEO1(1.18882); ITGB8(1.15984); ITGB2(1.12695); NLGN1(1.06767); PVRL2(0.997913); PVRL1(0.870676); SDC4(0.86555); SDC2(0.842449); MPZL1(0.764164); HLA-DRB3(0.760622); ITGB7(0.641235); SDC3(0.622043); CD2(0.510874); ITGAL(0.494027); ITGA8(0.452552); SPN(0.451747); CD80(0.436654); CLDN5(0.413735); ITGA9(0.408583); ICOSLG(0.38944); VCAM1(0.355924); CD58(0.34966); JAM3(0.328064); CD40(0.271072); CTLA4(0.235469); MPZ(0.201841); CDH4(0.153051); CLDN23(0.152577); CNTNAP2(0.151911); PDCD1(0.148295); CLDN8(0.145275); PTPRM(0.143739); PVR(0.141317); CLDN15(0.140329); NLGN2(0.109901); CLDN7(0.0862463); CD226(0.0850744); NEGR1(0.074967); HLA-DRB4(0.0708609); CD86(0.049911); CNTN2(0.0388065); CLDN22(0.0250695); CLDN19(-0.00470144); PVRL3(-0.0283273); ICOS(-0.029109); NRXN1(-0.0449846); CDH5(-0.0454215); SELP(-0.0525473); PDCD1LG2(-0.0638366); ALCAM(-0.0961286); SIGLEC1(-0.107639); CLDN10(-0.116504); CD28(-0.16103); ICAM2(-0.163859); CADM3(-0.19704); CD274(-0.205013); CLDN9(-0.214644); MADCAM1(-0.215493); SELL(-0.225305); CLDN6(-0.229819); JAM2(-0.231679); SELE(-0.245035); NCAM2(-0.267205); ITGB1(-0.270142); SELPLG(-0.283342); SDC1(-0.288947); CLDN11(-0.327623); CLDN3(-0.3312); NCAM1(-0.353834); CD276(-0.356116); CNTNAP1(-0.368075); ITGAM(-0.377333); CD8A(-0.391305); CD4(-0.44345); CD8B(-0.443911); ESAM(-0.453421); CLDN18(-0.473881); PTPRF(-0.477148); CLDN14(-0.482851); CDH1(-0.486818); VCAN(-0.490515); CDH3(-0.494496);

|                                                          |    |    |         |          |          |                                                                                                                                                                                                                                                                                                                                                                                                                                                                                                                                                                                                                                                                                                                                                                                                                                                                                                                                                                                                                                                                                                                                                                                                                                                                       |
|----------------------------------------------------------|----|----|---------|----------|----------|-----------------------------------------------------------------------------------------------------------------------------------------------------------------------------------------------------------------------------------------------------------------------------------------------------------------------------------------------------------------------------------------------------------------------------------------------------------------------------------------------------------------------------------------------------------------------------------------------------------------------------------------------------------------------------------------------------------------------------------------------------------------------------------------------------------------------------------------------------------------------------------------------------------------------------------------------------------------------------------------------------------------------------------------------------------------------------------------------------------------------------------------------------------------------------------------------------------------------------------------------------------------------|
| KEGG_LEISHMANIA_INFECTIO                                 | 72 | 70 | 6.08596 | 5.79E-10 | 6.02E-08 | HLA-DRB5(4.11028); HLA-DQA2(3.16347); HLA-DRA(3.14994); HLA-DOB(3.11438); HLA-DMB(3.09917); HLA-DMA(3.09615); TNF(3.09414); HLA-DPB1(3.03922); HLA-DPA1(3.0355); HLA-DQB1(2.97025); HLA-DQA1(2.94591); HLA-DRB1(2.76738); HLA-DOA(2.72508); TLR4(2.21756); TGFB2(2.02181); IFNG(1.74523); JAK2(1.45502); ITGA4(1.44516); ITGB2(1.12695); TGFB3(1.10517); CR1(0.912186); FCGR2A(0.817765); MARCKSL1(0.812128); HLA-DRB3(0.760622); TAB2(0.731235); MAPK3(0.624456); PRKCB(0.602839); TLR2(0.590802); NCF2(0.516355); NCF4(0.49207); MYD88(0.471396); FCGR3B(0.471305); FOS(0.425231); IL1A(0.402186); FCGR2C(0.401133); NCF1(0.394314); JAK1(0.383449); STAT1(0.352575); IL4(0.324564); NOS2(0.250046); NFKBIA(0.238702); IFNGR2(0.105199); MAPK1(0.0911524); HLA-DRB4(0.0708609); IL12A(0.0685942); NFKBIB(0.0251617); C3(0.0236471); MAPK14(-0.0381522); TGFB1(-0.0624259); NFKB1(-0.093743); IL10(-0.165903); MAP3K7(-0.169428); FCGR3A(-0.215961); IL12B(-0.245281); ITGB1(-0.270142); ITGAM(-0.377333); IL1B(-0.388308); TAB1(-0.419768); PTPN6(-0.471003); IFNGR1(-0.489543); FCGR1A(-0.500218); CYBA(-0.558807); IRAK4(-0.570726); PTGS2(-0.634009); MAPK11(-0.702316); MAPK12(-0.775969); RELA(-0.825039); TRAF6(-0.857055); MAPK13(-0.887493); JUN(-1.19243); |
| REACTOME_PHOSPHORYLATION_OF_CD3_AND_TCR_ZETA_CHAINS      | 16 | 16 | 6.01489 | 9.00E-10 | 8.63E-08 | HLA-DRB5(4.11028); HLA-DQA2(3.16347); HLA-DPB1(3.03922); HLA-DPA1(3.0355); HLA-DQA1(2.94591); HLA-DRB1(2.76738); CD247(1.89209); PTPRC(1.27284); PAG1(1.14607); HLA-DRB3(0.760622); LCK(0.533745); CSK(-0.230925); CD3D(-0.407789); CD3G(-0.42788); CD4(-0.44345); CD3E(-0.407789);                                                                                                                                                                                                                                                                                                                                                                                                                                                                                                                                                                                                                                                                                                                                                                                                                                                                                                                                                                                   |
| REACTOME_TRANSLOCATION_OF_ZAP70_TO_IMMUNOLOGICAL_SYNAPSE | 14 | 14 | 5.81813 | 2.98E-09 | 2.65E-07 | HLA-DRB5(4.11028); HLA-DQA2(3.16347); HLA-DPB1(3.03922); HLA-DPA1(3.0355); HLA-DQA1(2.94591); HLA-DRB1(2.76738); CD247(1.89209); HLA-DRB3(0.760622); LCK(0.533745); ZAP70(-0.00172016); CD3D(-0.407789); CD3G(-0.42788); CD4(-0.44345); CD3E(-0.776528);                                                                                                                                                                                                                                                                                                                                                                                                                                                                                                                                                                                                                                                                                                                                                                                                                                                                                                                                                                                                              |
| KEGG_PENTOSE_AND_GLUCURONATE_INTERCONVERSIONS            | 28 | 28 | 5.48127 | 2.11E-08 | 1.76E-06 | AKR1B1(3.55665); UGT1A3(3.33043); UGT1A4(3.31764); UGT1A5(3.30731); UGT1A6(3.26371); UGT1A7(3.2518); UGT1A9(3.23992); UGT1A10(3.20575); UGT1A8(3.17338); UGT2B4(1.16375); RPE(0.900657); DCXR(0.877826); UGDH(0.84563); XYLB(0.626148); UGT2B10(0.472469); DHDH(0.327385); UGT2B15(0.245708); GUSB(-0.133412); UGT2B11(-0.251929); UGP2(-0.494939); UGT2A3(-0.552256); UGT1A1(-0.592548); CRYL1(-0.651417); UGT2A1(-0.654466); LOC729020(-0.793317); UGT2B17(-0.890233); UGT2B28(-1.00335); UGT2B7(-1.01467);                                                                                                                                                                                                                                                                                                                                                                                                                                                                                                                                                                                                                                                                                                                                                         |

REACTOME\_INTERFERON\_S 159 152 5.44005 2.66E-08 2.08E-06 HLA-DRB5(4.11028); IRF4(3.50609); HLA-G(3.2749); NUP205(3.26973);  
IGNALING RNASEL(3.21504); HLA-DQA2(3.16347); HLA-DPB1(3.03922); HLA-  
DPA1(3.0355); HLA-A(3.02312); PSMB8(3.00361); HLA-C(2.98835); HLA-  
B(2.95626); HLA-DQA1(2.94591); HLA-F(2.83254); HLA-DRB1(2.76738);  
IFNA1(2.57774); TYK2(2.44754); ICAM1(2.37149); PIAS1(2.14783);  
EIF4G2(1.86535); IFNG(1.74523); NUP50(1.74379); PLCG1(1.65209);  
IFNA17(1.64472); SOCS1(1.64266); IFNA7(1.62659); GBP6(1.62604);  
IFNA10(1.62315); IFNA16(1.61427); NUP155(1.57778); ISG20(1.55916);  
IFNA14(1.46285); JAK2(1.45502); IFNA6(1.3785); NUP88(1.35027);  
CAMK2A(1.24873); GBP4(1.19154); IRF3(1.16083); EIF4G1(1.10593);  
GBP7(1.08423); UBE2L6(1.05749); CD44(0.94238); IFNA8(0.870525);  
MX1(0.866261); HLA-DRB3(0.760622); IRF6(0.6515); IFITM2(0.626267);  
MAPK3(0.624456); IFITM1(0.543564); OASL(0.47695); UBE2N(0.463792);  
IFIT3(0.457927); SUMO1(0.457212); JAK1(0.383449); IFIT2(0.379967);  
IFNB1(0.374848); CAMK2D(0.366921); VCAM1(0.355924); STAT1(0.352575);  
HERC5(0.333145); IRF8(0.327062); IFNA21(0.297396); XAF1(0.29443);  
AAAS(0.261018); GBP5(0.233135); IFNA4(0.226331); CAMK2B(0.223172);  
GBP1(0.221186); NUP54(0.215572); TRIM25(0.206339); UBA7(0.184271);  
GBP2(0.164722); NUP107(0.163271); IFNA2(0.151927); IFNAR1(0.145914);  
SOCS3(0.139116); PRKCD(0.111022); IFNGR2(0.105199); EIF4A1(0.0850123);  
IRF1(0.0352381); RAE1(0.0316352); KPNA5(0.0126091); NUP37(0.00304487);  
EIF4A3(-0.00908334); PTPN2(-0.015229); ADAR(-0.0197754); KPNA3(-  
0.0306584); PIN1(-0.0530086); EIF4E(-0.0676394); NUP153(-0.072529);  
UBA52(-0.0738406); IFIT1(-0.0922889); IRF9(-0.0949597); IFNA5(-0.102715);  
IRF5(-0.103255); DDX58(-0.128276); EIF4A2(-0.128915); POM121(-0.129579);  
ARIH1(-0.134761); RPS27A(-0.139867); NUP62(-0.146414); CIITA(-0.148118);  
STAT2(-0.174703); MX2(-0.223836); NUP35(-0.249654); SP100(-0.255957);  
IRF2(-0.26298); NUP133(-0.279295); TPR(-0.283345); PPM1B(-0.299717); PML(-  
0.313604); KPNA4(-0.335638); NCAM1(-0.353834); NUP43(-0.35942); IRF7(-



|                                              |    |    |         |          |          |                                                                                                                                                                                                                                                                                                                                                                                                                                                                                                                                                                                                                                                                                                                                                                                                                                                                                                                                                                                                                                                                                                                                                                                                                                                                          |
|----------------------------------------------|----|----|---------|----------|----------|--------------------------------------------------------------------------------------------------------------------------------------------------------------------------------------------------------------------------------------------------------------------------------------------------------------------------------------------------------------------------------------------------------------------------------------------------------------------------------------------------------------------------------------------------------------------------------------------------------------------------------------------------------------------------------------------------------------------------------------------------------------------------------------------------------------------------------------------------------------------------------------------------------------------------------------------------------------------------------------------------------------------------------------------------------------------------------------------------------------------------------------------------------------------------------------------------------------------------------------------------------------------------|
| REACTOME_RNA_POL_I_PR<br>OMOTER_OPENING      | 62 | 59 | 5.3131  | 5.39E-08 | 3.95E-06 | HIST1H2BL(3.64688); HIST1H3H(3.64339); HIST1H2BM(3.33787);<br>HIST1H2AJ(3.33787); HIST1H3J(2.00032); HIST1H2BO(1.99425);<br>HIST1H2BJ(1.65621); HIST1H4I(1.61301); HIST1H2BK(1.56533);<br>HIST1H2BN(1.48654); HIST1H4L(1.47987); HIST1H3I(1.47623);<br>HIST1H4J(1.34966); HIST1H4K(1.34164); HIST1H4D(1.03022);<br>HIST1H2BG(1.01864); HIST1H2AE(1.01701); HIST1H2AD(1.00268);<br>HIST1H2BF(0.999573); HIST1H3D(0.998028); HIST1H4E(0.996491);<br>HIST1H2BD(0.969877); HIST1H4C(0.940817); HIST1H2BE(0.886607);<br>H3F3A(0.794914); HIST1H2BA(0.742792); HIST1H3C(0.718367);<br>HIST1H2BB(0.718367); HIST1H4B(0.706147); HIST1H2AB(0.704646);<br>HIST1H3B(0.701784); MAPK3(0.624456); HIST1H2AC(0.586216);<br>HIST1H2BC(0.578733); HIST1H4H(0.572592); HIST4H4(0.427884);<br>UBTF(0.255051); H2AFZ(0.20518); H2AFX(0.153526); MBD2(0.0833909);<br>HIST1H3G(0.0698672); HIST1H2BI(0.0604719); HIST1H3F(-0.00841189);<br>HIST1H2BH(-0.00963075); HIST1H3E(-0.0205535); HIST1H4F(-0.133493);<br>HIST3H2BB(-0.174075); HIST1H3A(-0.323396); HIST2H3A(-0.324904);<br>HIST2H2AA4(-0.324904); HIST2H2AA3(-0.324904); HIST2H3C(-0.324904);<br>HIST1H4A(-0.328983); HIST2H4B(-0.506918); HIST2H4A(-0.506918);<br>HIST2H3D(-0.692711); HIST2H2AC(-0.768899); HIST2H2BE(-0.768899); |
| REACTOME_INTERFERON_A<br>LPHA_BETA_SIGNALING | 64 | 61 | 5.25201 | 7.52E-08 | 5.21E-06 | IRF4(3.50609); HLA-G(3.2749); RNASEL(3.21504); HLA-A(3.02312);<br>PSMB8(3.00361); HLA-C(2.98835); HLA-B(2.95626); HLA-F(2.83254);<br>IFNA1(2.57774); TYK2(2.44754); IFNA17(1.64472); SOCS1(1.64266);<br>IFNA7(1.62659); IFNA10(1.62315); IFNA16(1.61427); ISG20(1.55916);<br>IFNA14(1.46285); IFNA6(1.3785); IRF3(1.16083); IFNA8(0.870525);<br>MX1(0.866261); IRF6(0.6515); IFITM2(0.626267); IFITM1(0.543564);<br>OASL(0.47695); IFIT3(0.457927); JAK1(0.383449); IFIT2(0.379967);<br>IFNB1(0.374848); STAT1(0.352575); IRF8(0.327062); IFNA21(0.297396);<br>XAF1(0.29443); IFNA4(0.226331); GBP2(0.164722); IFNA2(0.151927);<br>IFNAR1(0.145914); SOCS3(0.139116); IRF1(0.0352381); ADAR(-0.0197754);<br>IFIT1(-0.0922889); IRF9(-0.0949597); IFNA5(-0.102715); IRF5(-0.103255);<br>STAT2(-0.174703); MX2(-0.223836); IRF2(-0.26298); IRF7(-0.362392); IFI35(-<br>0.420074); IP6K2(-0.426722); IFI27(-0.455219); PTPN6(-0.471003); OAS1(-<br>0.487347); USP18(-0.503593); PTPN1(-0.537427); EGR1(-0.604089); OAS3(-<br>0.640459); IFITM3(-0.648841); OAS2(-0.659179); IFNAR2(-0.777482); IFI6(-                                                                                                                                                                       |

|                                |    |    |         |          |          |                                                                                                                                                                                                                                                                                                                                                                                                                                                                                                                                                                                                                                                                                                                                                                                                                                                                                                                                                                                                                                                                                                                                                                                                                                                                                                                                                                                                                                                                                                                                                                                                                               |
|--------------------------------|----|----|---------|----------|----------|-------------------------------------------------------------------------------------------------------------------------------------------------------------------------------------------------------------------------------------------------------------------------------------------------------------------------------------------------------------------------------------------------------------------------------------------------------------------------------------------------------------------------------------------------------------------------------------------------------------------------------------------------------------------------------------------------------------------------------------------------------------------------------------------------------------------------------------------------------------------------------------------------------------------------------------------------------------------------------------------------------------------------------------------------------------------------------------------------------------------------------------------------------------------------------------------------------------------------------------------------------------------------------------------------------------------------------------------------------------------------------------------------------------------------------------------------------------------------------------------------------------------------------------------------------------------------------------------------------------------------------|
| BIOCARTA_INFLAM_PATHWAY        | 29 | 28 | 5.18905 | 1.06E-07 | 6.94E-06 | IL2(3.62922); CSF1(3.22141); HLA-DRA(3.14994); TNF(3.09414); LTA(3.08913); HLA-DRB1(2.76738); IFNA1(2.57774); TGFB2(2.02181); IL6(1.94139); IFNG(1.74523); TGFB3(1.10517); IL13(0.436581); IL1A(0.402186); IL15(0.401945); IFNB1(0.374848); IL4(0.324564); IL12A(0.0685942); IL5(0.0659333); CSF3(0.0591615); TGFB1(-0.0624259); IL10(-0.165903); IL12B(-0.245281); CSF2(-0.305327); IL3(-0.347172); CD4(-0.44345); IL11(-0.493573); IL8(-0.772185); IL7(-0.875573);                                                                                                                                                                                                                                                                                                                                                                                                                                                                                                                                                                                                                                                                                                                                                                                                                                                                                                                                                                                                                                                                                                                                                          |
| REACTOME_MEIOTIC_RECOMBINATION | 86 | 82 | 5.0308  | 2.44E-07 | 1.52E-05 | HIST1H2BL(3.64688); HIST1H3H(3.64339); HIST1H2BM(3.33787); HIST1H2AJ(3.33787); MSH5(3.15254); CDK4(2.97509); BRCA2(2.35166); HIST1H3J(2.00032); HIST1H2BO(1.99425); CDK2(1.81505); HIST1H2BJ(1.65621); HIST1H4I(1.61301); HIST1H2BK(1.56533); HIST1H2BN(1.48654); HIST1H4L(1.47987); HIST1H3I(1.47623); HIST1H4J(1.34966); HIST1H4K(1.34164); HIST1H4D(1.03022); HIST1H2BG(1.01864); HIST1H2AE(1.01701); HIST1H2AD(1.00268); HIST1H2BF(0.999573); HIST1H3D(0.998028); HIST1H4E(0.996491); HIST1H2BD(0.969877); HIST1H4C(0.940817); HIST1H2BE(0.886607); H3F3A(0.794914); HIST1H2BA(0.742792); HIST1H3C(0.718367); HIST1H2BB(0.718367); HIST1H4B(0.706147); HIST1H2AB(0.704646); HIST1H3B(0.701784); ATM(0.685671); HIST1H2AC(0.586216); HIST1H2BC(0.578733); HIST1H4H(0.572592); HIST4H4(0.427884); RBBP8(0.411239); RAD51C(0.390482); MLH1(0.330681); SPO11(0.287351); MND1(0.238327); H2AFZ(0.20518); RPA1(0.190989); MLH3(0.18499); H2AFX(0.153526); RAD50(0.0999338); HIST1H3G(0.0698672); HIST1H2BI(0.0604719); RAD51(0.0147742); MSH4(0.0103998); HIST1H3F(-0.00841189); HIST1H2BH(-0.00963075); HIST1H3E(-0.0205535); HIST1H4F(-0.133493); TOP3A(-0.155723); HIST3H2BB(-0.174075); HIST3H3(-0.174075); TEX15(-0.17573); DMC1(-0.198256); RPA2(-0.321658); HIST1H3A(-0.323396); HIST2H3A(-0.324904); HIST2H2AA4(-0.324904); HIST2H2AA3(-0.324904); HIST2H3C(-0.324904); HIST1H4A(-0.328983); HIST2H4B(-0.506918); HIST2H4A(-0.506918); MRE11A(-0.507037); NBN(-0.612852); BRCA1(-0.685812); HIST2H3D(-0.692711); HIST2H2AC(-0.768899); HIST2H2BE(-0.768899); PRDM9(-0.773514); BLM(-0.814123); RPA3(-0.861331); H3F3B(- |

KEGG\_NATURAL\_KILLER\_CE 137 127 5.02931 2.46E-07 1.52E-05 HLA-E(3.27708); HLA-G(3.2749); NCR3(3.12359); TNF(3.09414); MICA(3.04769); HLA-A(3.02312); HLA-C(2.98835); MICB(2.96716); HLA-B(2.95626); VAV3(2.88771); IFNA1(2.57774); ICAM1(2.37149); PLCG2(2.17046); PIK3R3(1.94002); CD247(1.89209); IFNG(1.74523); PLCG1(1.65209); IFNA17(1.64472); IFNA7(1.62659); IFNA10(1.62315); IFNA16(1.61427); PRF1(1.46483); IFNA14(1.46285); IFNA13(1.4019); IFNA6(1.3785); PIK3R5(1.26821); KRAS(1.22269); SHC4(1.16752); ITGB2(1.12695); FASLG(1.10083); VAV2(1.02671); PTPN11(0.969975); PRKCA(0.96566); SHC3(0.933645); FAS(0.923795); SYK(0.90112); NFATC1(0.889869); RAC3(0.881826); IFNA8(0.870525); PIK3R2(0.785577); GRB2(0.780792); PIK3CB(0.676287); MAPK3(0.624456); PRKCB(0.602839); RAC2(0.563748); PIK3CA(0.560854); ULBP3(0.549676); LCK(0.533745); ITGAL(0.494027); FCGR3B(0.471305); CD48(0.464596); NCR1(0.448768); NRAS(0.40874); IFNB1(0.374848); NFAT5(0.339119); IFNA21(0.297396); KLRD1(0.29064); SH2D1B(0.281985); NCR2(0.281494); PIK3CG(0.258004); PPP3R1(0.248522); IFNA4(0.226331); SHC2(0.204154); CD244(0.19703); CHP2(0.195824); KIR2DL4(0.178735); KIR3DL1(0.157683); IFNA2(0.151927); IFNAR1(0.145914); NFATC4(0.120894); IFNGR2(0.105199); PPP3CC(0.104707); MAPK1(0.0911524); PPP3R2(0.0651284); RAET1G(0.0439985); NFATC2(0.0310983); PPP3CB(0.0133119); TNFSF10(0.0126542); VAV1(0.0121818); ZAP70(-0.00172016); RAET1E(-0.0170625); SHC1(-0.0234288); PTK2B(-0.0251027); SOS1(-0.0432967); PRKCG(-0.057636); PIK3R1(-0.0591231); PPP3CA(-0.0889385); IFNA5(-0.102715); TYROBP(-0.162858); ICAM2(-0.163859); FCGR3A(-0.215961); FYN(-0.241479); GZMB(-0.268581); PIK3CD(-0.275423); LAT(-0.28376); PAK1(-0.283972); SH3BP2(-0.296303); MAP2K1(-0.299388); CSF2(-0.305327); HRAS(-0.315664); BRAF(-0.342713); KLRC2(-0.405379); TNFRSF10D(-0.411698); FCER1G(-0.449948); KLRC1(-0.466394); PTPN6(-0.471003); RAET1L(-0.472804); IFNGR1(-0.489543); TNFRSF10A(-0.503165); KIR2DS4(-0.529479); CASP3(-0.541075); ULBP1(-0.545794); RAF1(-0.578068);

|                                        |    |    |         |          |          |                                                                                                                                                                                                                                                                                                                                                                                                                                                                                                                                                                                                                                                                                                                                                                                                                                                                                                                                                                                                                                                                                                                                                                                                                                                                                                                                                                                                                                                                                                                                                                                                                                                         |
|----------------------------------------|----|----|---------|----------|----------|---------------------------------------------------------------------------------------------------------------------------------------------------------------------------------------------------------------------------------------------------------------------------------------------------------------------------------------------------------------------------------------------------------------------------------------------------------------------------------------------------------------------------------------------------------------------------------------------------------------------------------------------------------------------------------------------------------------------------------------------------------------------------------------------------------------------------------------------------------------------------------------------------------------------------------------------------------------------------------------------------------------------------------------------------------------------------------------------------------------------------------------------------------------------------------------------------------------------------------------------------------------------------------------------------------------------------------------------------------------------------------------------------------------------------------------------------------------------------------------------------------------------------------------------------------------------------------------------------------------------------------------------------------|
| REACTOME_RNA_POL_I_TRANSCRIPTION       | 89 | 82 | 4.96623 | 3.41E-07 | 1.93E-05 | HIST1H2BL(3.64688); HIST1H3H(3.64339); HIST1H2BM(3.33787); HIST1H2AJ(3.33787); GTF2H4(3.30408); EHMT2(3.23892); HIST1H3J(2.00032); HIST1H2BO(1.99425); HIST1H2BJ(1.65621); HIST1H4I(1.61301); HIST1H2BK(1.56533); HIST1H2BN(1.48654); HIST1H4L(1.47987); HIST1H3I(1.47623); HIST1H4J(1.34966); HIST1H4K(1.34164); TAF1C(1.05149); HIST1H4D(1.03022); HIST1H2BG(1.01864); HIST1H2AE(1.01701); HIST1H2AD(1.00268); HIST1H2BF(0.999573); HIST1H3D(0.998028); HIST1H4E(0.996491); HIST1H2BD(0.969877); HIST1H4C(0.940817); HIST1H2BE(0.886607); H3F3A(0.794914); HIST1H2BA(0.742792); HIST1H3C(0.718367); HIST1H2BB(0.718367); HIST1H4B(0.706147); HIST1H2AB(0.704646); GTF2H3(0.702393); HIST1H3B(0.701784); MAPK3(0.624456); HIST1H2AC(0.586216); HIST1H2BC(0.578733); HIST1H4H(0.572592); MNAT1(0.515742); ERCC2(0.4874); ERCC6(0.458173); HIST4H4(0.427884); KAT2B(0.415337); POLR1C(0.384827); UBTF(0.255051); ERCC3(0.231629); H2AFX(0.20518); H2AFX(0.153526); MBD2(0.0833909); HIST1H3G(0.0698672); HIST1H2BI(0.0604719); RRN3(0.0162713); PTRF(0.012188); HIST1H3F(-0.00841189); HIST1H2BH(-0.00963075); HIST1H3E(-0.0205535); POLR2K(-0.0229647); CCNH(-0.0699668); CBX3(-0.115933); HIST1H4F(-0.133493); POLR1A(-0.137977); HIST3H2BB(-0.174075); POLR1D(-0.212989); HIST1H3A(-0.323396); HIST2H3A(-0.324904); HIST2H2AA4(-0.324904); HIST2H2AA3(-0.324904); HIST2H3C(-0.324904); HIST1H4A(-0.328983); POLR1B(-0.373719); POLR2H(-0.423569); GTF2H1(-0.460931); HIST2H4B(-0.506918); HIST2H4A(-0.506918); TAF1B(-0.651239); HIST2H3D(-0.692711); HIST2H2AC(-0.768899); HIST2H2BE(-0.768899); TAF1A(-0.903816); H3F3B(-0.998166); CDK7(-1.04324); |
| KEGG_ASCORBATE_AND_ALDARATE_METABOLISM | 25 | 25 | 4.91344 | 4.47E-07 | 2.43E-05 | UGT1A3(3.33043); UGT1A4(3.31764); UGT1A5(3.30731); UGT1A6(3.26371); UGT1A7(3.2518); UGT1A9(3.23992); UGT1A10(3.20575); UGT1A8(3.17338); UGT2B4(1.16375); UGDH(0.84563); UGT2B10(0.472469); ALDH9A1(0.405664); ALDH1B1(0.302575); UGT2B15(0.245708); ALDH7A1(0.0547418); MIOX(-0.0829581); ALDH2(-0.114338); UGT2B11(-0.251929); ALDH3A2(-0.481261); UGT2A3(-0.552256); UGT1A1(-0.592548); UGT2A1(-0.654466); UGT2B17(-0.890233); UGT2B28(-1.00335); UGT2B7(-1.01467);                                                                                                                                                                                                                                                                                                                                                                                                                                                                                                                                                                                                                                                                                                                                                                                                                                                                                                                                                                                                                                                                                                                                                                                   |
| REACTOME_GLUCURONIDATION               | 18 | 18 | 4.87487 | 5.44E-07 | 2.83E-05 | UGT1A3(3.33043); UGT1A4(3.31764); UGT1A5(3.30731); UGT1A6(3.26371); UGT1A7(3.2518); UGT1A9(3.23992); UGT1A8(3.17338); UGT2B4(1.16375); UGDH(0.84563); UGT2B10(0.472469); UGT2B11(-0.251929); UGP2(-0.494939); UGT1A1(-0.592548); UGT2A1(-0.654466); SLC35D1(-0.689498); UGT2B17(-0.890233); UGT2B28(-1.00335); UGT2B7(-1.01467);                                                                                                                                                                                                                                                                                                                                                                                                                                                                                                                                                                                                                                                                                                                                                                                                                                                                                                                                                                                                                                                                                                                                                                                                                                                                                                                        |

|                                                                           |    |    |         |          |          |                                                                                                                                                                                                                                                                                                                                                                                                                                                                                                                                                                                                                                                                                                                                                                                                                                                                                                                                                                                                                                                                                                                                                                                                                                                                                                                                                                                         |
|---------------------------------------------------------------------------|----|----|---------|----------|----------|-----------------------------------------------------------------------------------------------------------------------------------------------------------------------------------------------------------------------------------------------------------------------------------------------------------------------------------------------------------------------------------------------------------------------------------------------------------------------------------------------------------------------------------------------------------------------------------------------------------------------------------------------------------------------------------------------------------------------------------------------------------------------------------------------------------------------------------------------------------------------------------------------------------------------------------------------------------------------------------------------------------------------------------------------------------------------------------------------------------------------------------------------------------------------------------------------------------------------------------------------------------------------------------------------------------------------------------------------------------------------------------------|
| REACTOME_PD1_SIGNALING                                                    | 18 | 18 | 4.76225 | 9.57E-07 | 4.77E-05 | HLA-DRB5(4.11028); HLA-DQA2(3.16347); HLA-DPB1(3.03922); HLA-DPA1(3.0355); HLA-DQA1(2.94591); HLA-DRB1(2.76738); CD247(1.89209); HLA-DRB3(0.760622); LCK(0.533745); PDCD1(0.148295); PDCD1LG2(-0.0638366); CD274(-0.205013); CSK(-0.230925); CD3D(-0.407789); CD3G(-0.42788); CD4(-0.44345); PTPN6(-0.471003); CD3E(-0.776528);                                                                                                                                                                                                                                                                                                                                                                                                                                                                                                                                                                                                                                                                                                                                                                                                                                                                                                                                                                                                                                                         |
| BIOCARTA_BLYMPHOCYTE_PATHWAY                                              | 11 | 11 | 4.75538 | 9.90E-07 | 4.77E-05 | HLA-DRA(3.14994); HLA-DRB1(2.76738); ICAM1(2.37149); PTPRC(1.27284); ITGB2(1.12695); CR2(1.11087); CR1(0.912186); FCGR2B(0.823869); ITGAL(0.494027); CD80(0.436654); CD40(0.271072);                                                                                                                                                                                                                                                                                                                                                                                                                                                                                                                                                                                                                                                                                                                                                                                                                                                                                                                                                                                                                                                                                                                                                                                                    |
| REACTOME_GENERATION_OF_SECOND_MESSENGER_MOLECULES                         | 27 | 26 | 4.72556 | 1.15E-06 | 5.30E-05 | HLA-DRB5(4.11028); HLA-DQA2(3.16347); HLA-DPB1(3.03922); HLA-DPA1(3.0355); HLA-DQA1(2.94591); HLA-DRB1(2.76738); CD247(1.89209); PLCG1(1.65209); FYB(1.09212); PAK2(1.08157); EVL(0.839492); HLA-DRB3(0.760622); ITK(0.578101); LCK(0.533745); ENAH(0.330282); VASP(0.0637886); ZAP70(-0.00172016); LAT(-0.28376); PAK1(-0.283972); CD3D(-0.407789); CD3G(-0.42788); CD4(-0.44345); GRAP2(-0.483501); NCK1(-0.499103); LCP2(-0.608545); CD3E(-0.776528);                                                                                                                                                                                                                                                                                                                                                                                                                                                                                                                                                                                                                                                                                                                                                                                                                                                                                                                                |
| REACTOME_DEPOSITION_OF_NEW_CENPA_CONTAINING_NUCLEOSOMES_AT_THE_CENTROMERE | 64 | 60 | 4.72202 | 1.17E-06 | 5.30E-05 | HIST1H2BL(3.64688); HIST1H2BM(3.33787); HIST1H2AJ(3.33787); RUVBL1(2.17911); HIST1H2BO(1.99425); HIST1H2BJ(1.65621); HIST1H4I(1.61301); CENPO(1.60503); HIST1H2BK(1.56533); HIST1H2BN(1.48654); HIST1H4L(1.47987); HIST1H4J(1.34966); HIST1H4K(1.34164); SMARCA5(1.33209); CENPP(1.15248); NPM1(1.11475); HIST1H4D(1.03022); HIST1H2BG(1.01864); HIST1H2AE(1.01701); HIST1H2AD(1.00268); HIST1H2BF(0.999573); HIST1H4E(0.996491); HIST1H2BD(0.969877); HIST1H4C(0.940817); HIST1H2BE(0.886607); MIS18A(0.830254); HIST1H2BA(0.742792); HIST1H2BB(0.718367); HIST1H4B(0.706147); HIST1H2AB(0.704646); CENPQ(0.639097); HIST1H2AC(0.586216); HIST1H2BC(0.578733); HIST1H4H(0.572592); HIST4H4(0.427884); OIP5(0.38921); RSF1(0.274594); CENPK(0.2128); H2AFZ(0.20518); H2AFX(0.153526); HIST1H2BI(0.0604719); HJURP(0.0523569); HIST1H2BH(-0.00963075); HIST1H4F(-0.133493); HIST3H2BB(-0.174075); CENPA(-0.215753); RBBP4(-0.234982); HIST2H2AA4(-0.324904); HIST2H2AA3(-0.324904); HIST1H4A(-0.328983); MIS18BP1(-0.356664); CENPN(-0.429677); HIST2H4B(-0.506918); HIST2H4A(-0.506918); CASC5(-0.544617); MLF1IP(-0.709465); HIST2H2AC(-0.768899); HIST2H2BE(-0.768899); ITGB3BP(-3.19009); C2(3.05293); C4A(3.05007); C4BPB(1.99063); C4BPA(1.88772); CR1(0.912186); CFH(0.698171); CFHR3(0.493245); PROS1(0.401499); CFI(0.305955); C3(0.0236471); CD46(-0.029984); CD55(-0.388429); |
| REACTOME_REGULATION_OF_COMPLEMENT_CASCADE                                 | 14 | 13 | 4.57045 | 2.43E-06 | 1.05E-04 |                                                                                                                                                                                                                                                                                                                                                                                                                                                                                                                                                                                                                                                                                                                                                                                                                                                                                                                                                                                                                                                                                                                                                                                                                                                                                                                                                                                         |

|                                                                                   |    |    |         |          |          |                                                                                                                                                                                                                                                                                                                                                                                                                                                                                                                                                                                                                                                                                                                                                                                                                                                                                                                                                                                                      |
|-----------------------------------------------------------------------------------|----|----|---------|----------|----------|------------------------------------------------------------------------------------------------------------------------------------------------------------------------------------------------------------------------------------------------------------------------------------------------------------------------------------------------------------------------------------------------------------------------------------------------------------------------------------------------------------------------------------------------------------------------------------------------------------------------------------------------------------------------------------------------------------------------------------------------------------------------------------------------------------------------------------------------------------------------------------------------------------------------------------------------------------------------------------------------------|
| REACTOME_PACKAGING_OF_TELOMERE_ENDS                                               | 48 | 48 | 4.3727  | 6.14E-06 | 2.55E-04 | HIST1H2BL(3.64688); HIST1H2BM(3.33787); HIST1H2AJ(3.33787); HIST1H2BO(1.99425); HIST1H2BJ(1.65621); HIST1H4I(1.61301); HIST1H2BK(1.56533); HIST1H2BN(1.48654); HIST1H4L(1.47987); HIST1H4J(1.34966); HIST1H4K(1.34164); HIST1H4D(1.03022); HIST1H2BG(1.01864); HIST1H2AE(1.01701); HIST1H2AD(1.00268); HIST1H2BF(0.999573); HIST1H4E(0.996491); HIST1H2BD(0.969877); HIST1H4C(0.940817); HIST1H2BE(0.886607); HIST1H2BA(0.742792); HIST1H2BB(0.718367); HIST1H4B(0.706147); HIST1H2AB(0.704646); HIST1H2AC(0.586216); HIST1H2BC(0.578733); HIST1H4H(0.572592); HIST4H4(0.427884); TERF1(0.387512); H2AFZ(0.20518); H2AFX(0.153526); HIST1H2BI(0.0604719); HIST1H2BH(-0.00963075); TERF2IP(-0.0218452); POT1(-0.0771591); HIST1H4F(-0.133493); HIST3H2BB(-0.174075); HIST3H3(-0.174075); ACD(-0.292378); HIST2H2AA4(-0.324904); HIST2H2AA3(-0.324904); HIST1H4A(-0.328983); HIST2H4B(-0.506918); HIST2H4A(-0.506918); TERF2(-0.576335); HIST2H2AC(-0.768899); HIST2H2BE(-0.768899); TINF2(-0.845881); |
| REACTOME_ANTIGEN_PRESENTATION_FOLDING_ASSEMBLY_AND_PEPTIDE_LOADING_OF_CLASS_I_MHC | 21 | 20 | 4.23977 | 1.12E-05 | 4.50E-04 | HLA-G(3.2749); HLA-A(3.02312); TAP1(2.99505); HLA-C(2.98835); HLA-B(2.95626); TAP2(2.93098); HLA-F(2.83254); HSPA5(0.578858); SEC23A(0.343005); SAR1B(0.0744041); SEC13(0.0406143); ERAP1(0.0308786); CANX(-0.00786418); SEC24D(-0.083122); PDIA3(-0.348713); SEC24B(-0.369967); CALR(-0.437964); B2M(-0.476766); SEC31A(-0.725987); SEC24C(-                                                                                                                                                                                                                                                                                                                                                                                                                                                                                                                                                                                                                                                        |

|                   |    |    |         |          |          |                                                                                                                                                                                                                                                                                                                                                                                                                                                                                                                                                                                                                                                                                                                                                                                                                                                                                                                                                                                                                                                                                                                                                                                                                                                                                                                                                                                                                                                                                                                                                                                  |
|-------------------|----|----|---------|----------|----------|----------------------------------------------------------------------------------------------------------------------------------------------------------------------------------------------------------------------------------------------------------------------------------------------------------------------------------------------------------------------------------------------------------------------------------------------------------------------------------------------------------------------------------------------------------------------------------------------------------------------------------------------------------------------------------------------------------------------------------------------------------------------------------------------------------------------------------------------------------------------------------------------------------------------------------------------------------------------------------------------------------------------------------------------------------------------------------------------------------------------------------------------------------------------------------------------------------------------------------------------------------------------------------------------------------------------------------------------------------------------------------------------------------------------------------------------------------------------------------------------------------------------------------------------------------------------------------|
| REACTOME_AMYLOIDS | 83 | 79 | 4.01431 | 2.98E-05 | 1.16E-03 | HIST1H2BL(3.64688); HIST1H3H(3.64339); HIST1H2BM(3.33787); HIST1H2AJ(3.33787); APP(2.16022); HIST1H3J(2.00032); HIST1H2BO(1.99425); HIST1H2BJ(1.65621); HIST1H4I(1.61301); HIST1H2BK(1.56533); APOA1(1.48746); HIST1H2BN(1.48654); HIST1H4L(1.47987); HIST1H3I(1.47623); HIST1H4J(1.34966); HIST1H4K(1.34164); TTR(1.14926); HIST1H4D(1.03022); HIST1H2BG(1.01864); HIST1H2AE(1.01701); HIST1H2AD(1.00268); HIST1H2BF(0.999573); HIST1H3D(0.998028); HIST1H4E(0.996491); HIST1H2BD(0.969877); HIST1H4C(0.940817); HIST1H2BE(0.886607); H3F3A(0.794914); FGA(0.779604); LYZ(0.763372); HIST1H2BA(0.742792); HIST1H3C(0.718367); HIST1H2BB(0.718367); HIST1H4B(0.706147); HIST1H2AB(0.704646); HIST1H3B(0.701784); ODAM(0.675195); HIST1H2AC(0.586216); HIST1H2BC(0.578733); HIST1H4H(0.572592); HIST4H4(0.427884); H2AFZ(0.20518); H2AFX(0.153526); HIST1H3G(0.0698672); HIST1H2BI(0.0604719); LTF(0.00829476); HIST1H3F(-0.00841189); HIST1H2BH(-0.00963075); HIST1H3E(-0.0205535); SEMG1(-0.0612963); GSN(-0.0870115); PRL(-0.0967271); HIST1H4F(-0.133493); HIST3H2BB(-0.174075); SAA1(-0.193753); NPPA(-0.245155); HIST1H3A(-0.323396); HIST2H3A(-0.324904); HIST2H2AA4(-0.324904); HIST2H2AA3(-0.324904); HIST2H3C(-0.324904); HIST1H4A(-0.328983); APCS(-0.36374); ITM2B(-0.440656); B2M(-0.476766); TGFBI(-0.478777); HIST2H4B(-0.506918); HIST2H4A(-0.506918); IAPP(-0.570128); MFGE8(-0.633599); INS(-0.642122); HIST2H3D(-0.692711); SNCA(-0.746797); HIST2H2AC(-0.768899); HIST2H2BE(-0.768899); CST3(-0.790065); CALCA(-0.871441); H3F3B(-0.998166); HSPG2(-1.18799); |
|-------------------|----|----|---------|----------|----------|----------------------------------------------------------------------------------------------------------------------------------------------------------------------------------------------------------------------------------------------------------------------------------------------------------------------------------------------------------------------------------------------------------------------------------------------------------------------------------------------------------------------------------------------------------------------------------------------------------------------------------------------------------------------------------------------------------------------------------------------------------------------------------------------------------------------------------------------------------------------------------------------------------------------------------------------------------------------------------------------------------------------------------------------------------------------------------------------------------------------------------------------------------------------------------------------------------------------------------------------------------------------------------------------------------------------------------------------------------------------------------------------------------------------------------------------------------------------------------------------------------------------------------------------------------------------------------|

|                                   |    |    |         |          |          |                                                                                                                                                                                                                                                                                                                                                                                                                                                                                                                                                                                                                                                                                                                                                                                                                                                                                                                                                                                                                                                                                                                                                                                                                                                                                                                                                                                                                                                       |
|-----------------------------------|----|----|---------|----------|----------|-------------------------------------------------------------------------------------------------------------------------------------------------------------------------------------------------------------------------------------------------------------------------------------------------------------------------------------------------------------------------------------------------------------------------------------------------------------------------------------------------------------------------------------------------------------------------------------------------------------------------------------------------------------------------------------------------------------------------------------------------------------------------------------------------------------------------------------------------------------------------------------------------------------------------------------------------------------------------------------------------------------------------------------------------------------------------------------------------------------------------------------------------------------------------------------------------------------------------------------------------------------------------------------------------------------------------------------------------------------------------------------------------------------------------------------------------------|
| KEGG_ECM_RECEPTOR_INT<br>ERACTION | 84 | 83 | 3.97123 | 3.58E-05 | 1.35E-03 | LAMB4(3.37887); ITGB5(3.23431); COL11A2(3.01016); TNXB(2.92941); LAMA2(2.79088); VWF(2.7145); CHAD(2.07091); LAMC2(2.04298); ITGAV(1.7391); COL3A1(1.66226); COL2A1(1.52121); ITGA4(1.44516); ITGA2B(1.40185); HMMR(1.37981); COL4A1(1.29874); COL4A2(1.18146); ITGB8(1.15984); ITGA7(1.11531); ITGA11(1.11041); COL6A3(0.993715); FN1(0.988396); COL5A2(0.953369); CD44(0.94238); ITGA5(0.904116); THBS4(0.88757); SDC4(0.86555); SDC2(0.842449); LAMC3(0.836792); COL6A2(0.757857); COL1A2(0.651099); ITGB7(0.641235); SDC3(0.622043); LAMA5(0.590045); ITGB4(0.578444); LAMC1(0.571865); GP1BA(0.566587); LAMB3(0.543038); GP9(0.539257); ITGA8(0.452552); ITGA1(0.450055); TNR(0.441652); ITGA9(0.408583); ITGA3(0.406554); COL1A1(0.387913); GP1BB(0.373696); DAG1(0.358283); LAMA4(0.311716); VTN(0.303707); TNN(0.25853); COL5A3(0.243083); LAMB2(0.122884); ITGB6(0.109988); LAMA1(0.0431173); COL11A1(-0.0467516); THBS1(-0.103437); RELN(-0.105007); COL6A1(-0.113865); COMP(-0.131669); ITGA10(-0.205746); COL5A1(-0.240827); CD36(-0.268064); ITGB1(-0.270142); SDC1(-0.288947); CD47(-0.342467); COL4A4(-0.386131); SV2B(-0.387457); ITGB3(-0.412409); THBS2(-0.476488); SV2C(-0.504773); IBSP(-0.508706); SPP1(-0.554361); LAMA3(-0.573757); LAMB1(-0.573852); AGRN(-0.575591); GP6(-0.583305); ITGA6(-0.590149); COL6A6(-0.727478); TNC(-0.732574); THBS3(-0.794529); SV2A(-0.90502); ITGA2(-1.18227); HSPG2(-1.18799); GP5(-1.30973); |
| REACTOME_ER_PHAGOSO<br>ME_PATHWAY | 61 | 57 | 3.96638 | 3.65E-05 | 1.35E-03 | HLA-G(3.2749); PSMB9(3.04533); HLA-A(3.02312); PSMB8(3.00361); TAP1(2.99505); HLA-C(2.98835); HLA-B(2.95626); TAP2(2.93098); HLA-F(2.83254); SEC61A1(2.27347); PSMA1(1.48788); SEC61G(1.43919); PSMB2(1.36017); PSMC6(1.31664); PSMD2(1.16567); PSMB5(0.996426); PSMA4(0.945638); PSMA6(0.812636); PSMD12(0.79588); PSMD13(0.691533); PSMD5(0.622502); PSMB7(0.511915); PSMB1(0.438753); PSMF1(0.312777); PSMB6(0.261871); PSMC3(0.227309); PSMA8(0.131841); PSMC2(0.0697873); PSMD14(0.0631301); PSMD4(0.0425618); PSMC5(0.035821); PSME2(-0.0436557); PSMD9(-0.0636891); UBA52(-0.0738406); PSME1(-0.079645); PSMA3(-0.112865); PSMA5(-0.117597); PSMD3(-0.125702); RPS27A(-0.139867); PSMD8(-0.30713); PSMD7(-0.327433); PSMA7(-0.328163); PDIA3(-0.348713); PSMC4(-0.368903); CALR(-0.437964); B2M(-0.476766); PSMA2(-0.47921); PSMB4(-0.511373); PSMD1(-0.551815); PSMB3(-0.554028); PSMD11(-0.581193); PSMC1(-0.650563); SEC61A2(-0.692885); PSME4(-0.732192); SEC61B(-0.791351); PSMD6(-0.807573); PSMB10(-0.83374);                                                                                                                                                                                                                                                                                                                                                                                                                           |



|                                                |    |    |         |          |          |                                                                                                                                                                                                                                                                                                                                                                                                                                                                                                                                                                                                                                                                                                                                                                                                                                                                                                                                                                                                                                                                                                                                                                                                                                                                                                                                                                                                                                                                                                                                                                                                                                                                                                                                                                                                                                                                                                                                                                                                                                                                                                                                                                                                                                                                           |
|------------------------------------------------|----|----|---------|----------|----------|---------------------------------------------------------------------------------------------------------------------------------------------------------------------------------------------------------------------------------------------------------------------------------------------------------------------------------------------------------------------------------------------------------------------------------------------------------------------------------------------------------------------------------------------------------------------------------------------------------------------------------------------------------------------------------------------------------------------------------------------------------------------------------------------------------------------------------------------------------------------------------------------------------------------------------------------------------------------------------------------------------------------------------------------------------------------------------------------------------------------------------------------------------------------------------------------------------------------------------------------------------------------------------------------------------------------------------------------------------------------------------------------------------------------------------------------------------------------------------------------------------------------------------------------------------------------------------------------------------------------------------------------------------------------------------------------------------------------------------------------------------------------------------------------------------------------------------------------------------------------------------------------------------------------------------------------------------------------------------------------------------------------------------------------------------------------------------------------------------------------------------------------------------------------------------------------------------------------------------------------------------------------------|
| BIOCARTA_CYTOKINE_PATHWAY                      | 22 | 21 | 3.95912 | 3.76E-05 | 1.35E-03 | IL2(3.62922); TNF(3.09414); LTA(3.08913); IFNA1(2.57774); IL6(1.94139); IFNG(1.74523); IL9(0.88924); IL17A(0.488799); IL13(0.436581); IL1A(0.402186); IL15(0.401945); IFNB1(0.374848); IL4(0.324564); IL18(0.209739); IL12A(0.0685942); IL5(0.0659333); IL10(-0.165903); IL16(-0.205304); IL12B(-0.245281); IL3(-0.347172); IL8(-0.772185);                                                                                                                                                                                                                                                                                                                                                                                                                                                                                                                                                                                                                                                                                                                                                                                                                                                                                                                                                                                                                                                                                                                                                                                                                                                                                                                                                                                                                                                                                                                                                                                                                                                                                                                                                                                                                                                                                                                               |
| REACTOME_ANTIGEN_PROCESSING_CROSS_PRESENTATION | 76 | 69 | 3.94728 | 3.95E-05 | 1.37E-03 | HLA-G(3.2749); ITGB5(3.23431); PSMB9(3.04533); HLA-A(3.02312); PSMB8(3.00361); TAP1(2.99505); HLA-C(2.98835); HLA-B(2.95626); TAP2(2.93098); HLA-F(2.83254); SEC61A1(2.27347); ITGAV(1.7391); PSMA1(1.48788); SEC61G(1.43919); PSMB2(1.36017); PSMC6(1.31664); PSMD2(1.16567); PSMB5(0.996426); PSMA4(0.945638); PSMA6(0.812636); PSMD12(0.79588); CTSS(0.725716); PSMD13(0.691533); PSMD5(0.622502); NCF2(0.516355); PSMB7(0.511915); NCF4(0.49207); PSMB1(0.438753); PSMF1(0.312777); PSMB6(0.261871); PSMC3(0.227309); PSMA8(0.131841); PSMC2(0.0697873); PSMD14(0.0631301); PSMD4(0.0425618); PSMC5(0.035821); MRC1(-0.00618665); PSME2(-0.0436557); PSMD9(-0.0636891); UBA52(-0.0738406); PSME1(-0.079645); PSMA3(-0.112865); PSMA5(-0.117597); PSMD3(-0.125702); RPS27A(-0.139867); CD207(-0.2453); CD36(-0.268064); MRC2(-0.280123); PSMD8(-0.30713); PSMD7(-0.327433); PSMA7(-0.328163); PDIA3(-0.348713); PSMC4(-0.368903); CALR(-0.437964); B2M(-0.476766); PSMA2(-0.47921); FCGR1A(-0.500218); PSMB4(-0.511373); PSMD1(-0.551815); PSMB3(-0.554028); CYBA(-0.558807); PSMD11(-0.581193); PSMC1(-0.650563); SEC61A2(-0.692885); PSME4(-0.732192); SEC61B(-0.791351); PSMD6(-0.807573); PSMB10(-0.83374); LNPEP(-0.937282); UGT1A3(3.33043); UGT1A4(3.31764); UGT1A5(3.30731); UGT1A6(3.26371); UGT1A7(3.2518); UGT1A9(3.23992); UGT1A10(3.20575); UGT1A8(3.17338); CYP21A2(3.0787); SRD5A3(2.34155); CYP11A1(2.3359); AKR1C3(1.86067); CYP19A1(1.72438); HSD17B8(1.70905); HSD17B2(1.68445); CYP3A43(1.22803); UGT2B4(1.16375); AKR1C4(1.06212); HSD17B3(0.898459); HSD11B1(0.630927); HSD17B7(0.507201); UGT2B10(0.472469); HSD3B2(0.402481); SRD5A1(0.285992); UGT2B15(0.245708); CYP7B1(0.226638); COMT(0.0966209); HSD17B12(0.0745385); CYP7A1(-0.0284533); UGT2B11(-0.251929); HSD17B6(-0.315751); AKR1C1(-0.369304); CYP3A4(-0.428428); HSD11B2(-0.437819); SULT2B1(-0.471181); SULT1E1(-0.515361); UGT2A3(-0.552256); UGT1A1(-0.592548); CYP17A1(-0.646421); CYP1B1(-0.646569); AKR1D1(-0.648686); UGT2A1(-0.654466); AKR1C2(-0.663023); CYP3A5(-0.745416); CYP1A1(-0.771478); SRD5A2(-0.802737); CYP11B2(-0.809114); UGT2B17(-0.890233); HSD17B1(-0.968141); CYP11B1(-0.989356); UGT2B28(-1.00335); UGT2B7(-1.01467); HSD3B1(-1.0255); CYP3A7(-1.1341); |
| KEGG_STEROID_HORMONE_BIOSYNTHESIS              | 55 | 54 | 3.8505  | 5.89E-05 | 1.99E-03 | UGT1A3(3.33043); UGT1A4(3.31764); UGT1A5(3.30731); UGT1A6(3.26371); UGT1A7(3.2518); UGT1A9(3.23992); UGT1A10(3.20575); UGT1A8(3.17338); CYP21A2(3.0787); SRD5A3(2.34155); CYP11A1(2.3359); AKR1C3(1.86067); CYP19A1(1.72438); HSD17B8(1.70905); HSD17B2(1.68445); CYP3A43(1.22803); UGT2B4(1.16375); AKR1C4(1.06212); HSD17B3(0.898459); HSD11B1(0.630927); HSD17B7(0.507201); UGT2B10(0.472469); HSD3B2(0.402481); SRD5A1(0.285992); UGT2B15(0.245708); CYP7B1(0.226638); COMT(0.0966209); HSD17B12(0.0745385); CYP7A1(-0.0284533); UGT2B11(-0.251929); HSD17B6(-0.315751); AKR1C1(-0.369304); CYP3A4(-0.428428); HSD11B2(-0.437819); SULT2B1(-0.471181); SULT1E1(-0.515361); UGT2A3(-0.552256); UGT1A1(-0.592548); CYP17A1(-0.646421); CYP1B1(-0.646569); AKR1D1(-0.648686); UGT2A1(-0.654466); AKR1C2(-0.663023); CYP3A5(-0.745416); CYP1A1(-0.771478); SRD5A2(-0.802737); CYP11B2(-0.809114); UGT2B17(-0.890233); HSD17B1(-0.968141); CYP11B1(-0.989356); UGT2B28(-1.00335); UGT2B7(-1.01467); HSD3B1(-1.0255); CYP3A7(-1.1341);                                                                                                                                                                                                                                                                                                                                                                                                                                                                                                                                                                                                                                                                                                                                                                                                                                                                                                                                                                                                                                                                                                                                                                                                                                      |

REACTOME\_RNA\_POL\_I\_RN 122 115 3.82451 6.55E-05 2.15E-03 HIST1H2BL(3.64688); HIST1H3H(3.64339); HIST1H2BM(3.33787);  
A\_POL\_III\_AND\_MITOCHONDRIAL\_TRANSCRIPTION HIST1H2AJ(3.33787); GTF2H4(3.30408); EHMT2(3.23892); HIST1H3J(2.00032);  
HIST1H2BO(1.99425); POLR3F(1.92184); HIST1H2BJ(1.65621);  
HIST1H4I(1.61301); HIST1H2BK(1.56533); GTF3C2(1.48839);  
HIST1H2BN(1.48654); HIST1H4L(1.47987); HIST1H3I(1.47623);  
HIST1H4J(1.34966); HIST1H4K(1.34164); POLR3D(1.14744); TAF1C(1.05149);  
HIST1H4D(1.03022); HIST1H2BG(1.01864); HIST1H2AE(1.01701);  
HIST1H2AD(1.00268); HIST1H2BF(0.999573); HIST1H3D(0.998028);  
HIST1H4E(0.996491); HIST1H2BD(0.969877); HIST1H4C(0.940817);  
NFIB(0.886748); HIST1H2BE(0.886607); H3F3A(0.794914);  
HIST1H2BA(0.742792); HIST1H3C(0.718367); HIST1H2BB(0.718367);  
HIST1H4B(0.706147); HIST1H2AB(0.704646); GTF2H3(0.702393);  
HIST1H3B(0.701784); POLR3B(0.670615); POU2F1(0.646399); MAPK3(0.624456);  
HIST1H2AC(0.586216); HIST1H2BC(0.578733); GTF3C3(0.573972);  
HIST1H4H(0.572592); TFAM(0.520983); MNAT1(0.515742); ERCC2(0.4874);  
ERCC6(0.458173); HIST4H4(0.427884); GTF3C5(0.419574); KAT2B(0.415337);  
TBP(0.395804); ZNF143(0.386368); POLR1C(0.384827); BR2F(0.3707);  
UBTF(0.255051); POLR3H(0.251452); ERCC3(0.231629); POLR2L(0.227119);  
H2AFZ(0.20518); H2AFX(0.153526); MBD2(0.0833909); SSB(0.070463);  
HIST1H3G(0.0698672); HIST1H2BI(0.0604719); POLRMT(0.042945);  
RRN3(0.0162713); PTRF(0.012188); SNAPC5(-0.00183944); HIST1H3F(-  
0.00841189); HIST1H2BH(-0.00963075); HIST1H3E(-0.0205535); POLR2K(-  
0.0229647); CCNH(-0.0699668); CBX3(-0.115933); HIST1H4F(-0.133493);  
POLR1A(-0.137977); SNAPC4(-0.167191); POLR3A(-0.168817); HIST3H2BB(-  
0.174075); POLR1D(-0.212989); LZTS1(-0.235808); SNAPC3(-0.312175);  
HIST1H3A(-0.323396); HIST2H3A(-0.324904); HIST2H2AA4(-0.324904);  
HIST2H2AA3(-0.324904); HIST2H3C(-0.324904); HIST1H4A(-0.328983);  
POLR1B(-0.373719); POLR2H(-0.423569); POLR3GL(-0.425359); POLR2E(-  
0.459744); GTF2H1(-0.460931); HIST2H4B(-0.506918); HIST2H4A(-0.506918);

REACTOME\_MEIOSIS

116

108

3.79958

7.25E-05

2.32E-03

HIST1H2BL(3.64688); HIST1H3H(3.64339); HIST1H2BM(3.33787);  
HIST1H2AJ(3.33787); MSH5(3.15254); CDK4(2.97509); BRCA2(2.35166);  
HIST1H3J(2.00032); HIST1H2BO(1.99425); CDK2(1.81505); HIST1H2BJ(1.65621);  
HIST1H4I(1.61301); SMC3(1.58222); HIST1H2BK(1.56533); HIST1H2BN(1.48654);  
HIST1H4L(1.47987); HIST1H3I(1.47623); HIST1H4J(1.34966); HIST1H4K(1.34164);  
HIST1H4D(1.03022); HIST1H2BG(1.01864); HIST1H2AE(1.01701);  
HIST1H2AD(1.00268); HIST1H2BF(0.999573); HIST1H3D(0.998028);  
HIST1H4E(0.996491); HIST1H2BD(0.969877); HIST1H4C(0.940817);  
HIST1H2BE(0.886607); LMNB1(0.811756); H3F3A(0.794914); RAD21(0.789717);  
HIST1H2BA(0.742792); HIST1H3C(0.718367); HIST1H2BB(0.718367);  
HIST1H4B(0.706147); HIST1H2AB(0.704646); HIST1H3B(0.701784);  
ATM(0.685671); STAG3(0.613512); SYCP1(0.592728); HIST1H2AC(0.586216);  
HIST1H2BC(0.578733); HIST1H4H(0.572592); HIST4H4(0.427884);  
HSPA2(0.427194); RBBP8(0.411239); RAD51C(0.390482); TERF1(0.387512);  
MLH1(0.330681); SPO11(0.287351); MND1(0.238327); TEX12(0.231152);  
H2AFZ(0.20518); RPA1(0.190989); MLH3(0.18499); H2AFX(0.153526);  
STAG1(0.105954); RAD50(0.0999338); HIST1H3G(0.0698672); SUN2(0.0645185);  
HIST1H2BI(0.0604719); SMC1B(0.0380651); RAD51(0.0147742);  
MSH4(0.0103998); HIST1H3F(-0.00841189); HIST1H2BH(-0.00963075); SYNE1(-  
0.0140129); HIST1H3E(-0.0205535); TERF2IP(-0.0218452); REC8(-0.0637384);  
POT1(-0.0771591); LMNA(-0.119259); HIST1H4F(-0.133493); TOP3A(-  
0.155723); HIST3H2BB(-0.174075); HIST3H3(-0.174075); TEX15(-0.17573);  
DMC1(-0.198256); DIDO1(-0.254074); ACD(-0.292378); RPA2(-0.321658);  
HIST1H3A(-0.323396); HIST2H3A(-0.324904); HIST2H2AA4(-0.324904);  
HIST2H2AA3(-0.324904); HIST2H3C(-0.324904); HIST1H4A(-0.328983);  
SYCP2(-0.504268); HIST2H4B(-0.506918); HIST2H4A(-0.506918); MRE11A(-  
0.507037); SYCP3(-0.530403); TERF2(-0.576335); NBN(-0.612852); BRCA1(-  
0.685812); HIST2H3D(-0.692711); UBE2I(-0.745838); HIST2H2AC(-0.768899);  
HIST2H2BE(-0.768899); PRDM9(-0.773514); BLM(-0.814123); TIN2(-0.845881);

|                                     |     |     |         |          |          |                                                                                                                                                                                                                                                                                                                                                                                                                                                                                                                                                                                                                                                                                                                                                                                                                                                                                                                                                                                                                                                                                                                                                                                                                                                                                                                                                                                                                                                                                                                                                                                                                                                                                                                                                                                                                                                                                                                                                                                                                                                                                                                                                                                                                                                              |
|-------------------------------------|-----|-----|---------|----------|----------|--------------------------------------------------------------------------------------------------------------------------------------------------------------------------------------------------------------------------------------------------------------------------------------------------------------------------------------------------------------------------------------------------------------------------------------------------------------------------------------------------------------------------------------------------------------------------------------------------------------------------------------------------------------------------------------------------------------------------------------------------------------------------------------------------------------------------------------------------------------------------------------------------------------------------------------------------------------------------------------------------------------------------------------------------------------------------------------------------------------------------------------------------------------------------------------------------------------------------------------------------------------------------------------------------------------------------------------------------------------------------------------------------------------------------------------------------------------------------------------------------------------------------------------------------------------------------------------------------------------------------------------------------------------------------------------------------------------------------------------------------------------------------------------------------------------------------------------------------------------------------------------------------------------------------------------------------------------------------------------------------------------------------------------------------------------------------------------------------------------------------------------------------------------------------------------------------------------------------------------------------------------|
| KEGG_JAK_STAT_SIGNALIN<br>G_PATHWAY | 155 | 143 | 3.77851 | 7.89E-05 | 2.46E-03 | IL2(3.62922); PIAS2(2.97552); IL21(2.84127); IFNA1(2.57774); TYK2(2.44754); PRLR(2.35874); IL2RA(2.22875); PIAS1(2.14783); IL10RA(1.96086); IL6(1.94139); PIK3R3(1.94002); CBL(1.7632); GHR(1.74886); IFNG(1.74523); IFNA17(1.64472); SOCS1(1.64266); IFNA7(1.62659); IFNA10(1.62315); IFNA16(1.61427); IFNA14(1.46285); JAK2(1.45502); CLCF1(1.45022); IFNA13(1.4019); IFNA6(1.3785); IL22RA1(1.31631); PIK3R5(1.26821); IFNE(1.24777); IL26(1.15996); IL15RA(1.1474); LEP(1.12923); PTPN11(0.969975); IL10RB(0.932331); IL9(0.88924); IFNA8(0.870525); IL5RA(0.870477); IL12RB2(0.802748); PIK3R2(0.785577); GRB2(0.780792); IL20RA(0.696685); IL23R(0.695452); PIK3CB(0.676287); IL12RB1(0.621321); EPO(0.571208); PIK3CA(0.560854); IFNK(0.554798); STAT3(0.530038); SOCS5(0.458407); CCND3(0.449449); CBLB(0.438177); IL13(0.436581); IL6R(0.423846); STAT6(0.415586); IL15(0.401945); CBLC(0.393777); IL2RB(0.384893); JAK1(0.383449); CCND2(0.381624); AKT3(0.376292); IFNB1(0.374848); STAT1(0.352575); IL21R(0.337385); IL4(0.324564); CSF2RB(0.308307); IL22(0.305662); IFNA21(0.297396); IL6ST(0.282399); TSLP(0.26491); PIK3CG(0.258004); LIF(0.230182); IFNA4(0.226331); SPRY2(0.218438); SPRY1(0.218343); OSM(0.216778); STAT4(0.216039); JAK3(0.210358); CNTFR(0.188718); IFNA2(0.151927); IFNAR1(0.145914); IL7R(0.141152); SOCS3(0.139116); BCL2L1(0.1384); GH1(0.129896); IFNGR2(0.105199); IL12A(0.0685942); IL5(0.0659333); CSF3(0.0591615); CREBBP(0.0557655); IL19(0.0512859); IFNW1(0.03541); CSH1(-0.0330408); SOS1(-0.0432967); PIK3R1(-0.0591231); TPO(-0.0662216); IL11RA(-0.0874665); GH2(-0.092119); IRF9(-0.0949597); PRL(-0.0967271); PIAS4(-0.101555); IFNA5(-0.102715); SPRED1(-0.120626); OSMR(-0.152746); IL10(-0.165903); SPRED2(-0.170945); STAT2(-0.174703); SOCS2(-0.197171); STAM(-0.210806); CSF3R(-0.23452); IL12B(-0.245281); PIK3CD(-0.275423); CSF2(-0.305327); IL23A(-0.308224); LEPR(-0.311088); CISH(-0.324282); STAT5A(-0.337553); MYC(-0.339555); IL3(-0.347172); LIFR(-0.354018); IL4R(-0.365623); SOCS7(-0.366487); STAM2(-0.366487); HLA-DRA(3.14994); HLA-DRB1(2.76738); FASLG(1.10083); FAS(0.923795); CD80(0.436654); IL4(0.324564); CD40(0.271072); CD28(-0.16103); IL10(-0.165903); CD4(-0.44345); |
| BIOCARTA_ASBCCELL_PATH<br>WAY       | 12  | 11  | 3.72074 | 9.93E-05 | 3.02E-03 |                                                                                                                                                                                                                                                                                                                                                                                                                                                                                                                                                                                                                                                                                                                                                                                                                                                                                                                                                                                                                                                                                                                                                                                                                                                                                                                                                                                                                                                                                                                                                                                                                                                                                                                                                                                                                                                                                                                                                                                                                                                                                                                                                                                                                                                              |

|                                   |    |    |         |          |          |                                                                                                                                                                                                                                                                                                                                                                                                                                                                                                                                                                                                                                                                                                                                                                                                                                                                                                        |
|-----------------------------------|----|----|---------|----------|----------|--------------------------------------------------------------------------------------------------------------------------------------------------------------------------------------------------------------------------------------------------------------------------------------------------------------------------------------------------------------------------------------------------------------------------------------------------------------------------------------------------------------------------------------------------------------------------------------------------------------------------------------------------------------------------------------------------------------------------------------------------------------------------------------------------------------------------------------------------------------------------------------------------------|
| REACTOME_DOWNSTREAM_TCR_SIGNALING | 37 | 34 | 3.51451 | 2.20E-04 | 6.54E-03 | HLA-DRB5(4.11028); HLA-DQA2(3.16347); HLA-DPB1(3.03922); HLA-DPA1(3.0355); HLA-DQA1(2.94591); HLA-DRB1(2.76738); CD247(1.89209); PIK3R2(0.785577); HLA-DRB3(0.760622); TAB2(0.731235); PIK3CB(0.676287); CARD11(0.618513); PIK3CA(0.560854); LCK(0.533745); LOC646626(0.499477); UBE2N(0.463792); BCL10(0.45203); NFKBIA(0.238702); IKBKB(0.234276); RIPK2(0.180779); CHUK(0.0132043); PIK3R1(-0.0591231); TRAT1(-0.139207); MAP3K7(-0.169428); MALT1(-0.404968); CD3D(-0.407789); PTEN(-0.425435); CD3G(-0.42788); TMEM189-UBE2V1(-0.429019); CD4(-0.44345); PRKCQ(-0.709571); CD3E(-0.776528); RELA(-0.825039); TRAF6(-0.857055);                                                                                                                                                                                                                                                                    |
| REACTOME_TCR_SIGNALING            | 54 | 50 | 3.50868 | 2.25E-04 | 6.54E-03 | HLA-DRB5(4.11028); HLA-DQA2(3.16347); HLA-DPB1(3.03922); HLA-DPA1(3.0355); HLA-DQA1(2.94591); HLA-DRB1(2.76738); CD247(1.89209); PLCG1(1.65209); PTPRC(1.27284); PAG1(1.14607); FYB(1.09212); PAK2(1.08157); EVL(0.839492); PIK3R2(0.785577); HLA-DRB3(0.760622); TAB2(0.731235); PIK3CB(0.676287); CARD11(0.618513); ITK(0.578101); PIK3CA(0.560854); LCK(0.533745); LOC646626(0.499477); UBE2N(0.463792); BCL10(0.45203); ENAH(0.330282); NFKBIA(0.238702); IKBKB(0.234276); RIPK2(0.180779); VASP(0.0637886); CHUK(0.0132043); ZAP70(-0.00172016); PIK3R1(-0.0591231); TRAT1(-0.139207); MAP3K7(-0.169428); CSK(-0.230925); LAT(-0.28376); PAK1(-0.283972); MALT1(-0.404968); CD3D(-0.407789); PTEN(-0.425435); CD3G(-0.42788); TMEM189-UBE2V1(-0.429019); CD4(-0.44345); GRAP2(-0.483501); NCK1(-0.499103); LCP2(-0.608545); PRKCQ(-0.709571); CD3E(-0.776528); RELA(-0.825039); TRAF6(-0.857055); |

|                             |    |    |         |          |          |                                                                                                                                                                                                                                                                                                                                                                                                                                                                                                                                                                                                                                                                                                                                                                                                                                                                                                                                                                                                                                                                                                                                                                                                                                                                                                                                                                                                                           |
|-----------------------------|----|----|---------|----------|----------|---------------------------------------------------------------------------------------------------------------------------------------------------------------------------------------------------------------------------------------------------------------------------------------------------------------------------------------------------------------------------------------------------------------------------------------------------------------------------------------------------------------------------------------------------------------------------------------------------------------------------------------------------------------------------------------------------------------------------------------------------------------------------------------------------------------------------------------------------------------------------------------------------------------------------------------------------------------------------------------------------------------------------------------------------------------------------------------------------------------------------------------------------------------------------------------------------------------------------------------------------------------------------------------------------------------------------------------------------------------------------------------------------------------------------|
| KEGG_SMALL_CELL_LUNG_CANCER | 84 | 81 | 3.47715 | 2.53E-04 | 7.18E-03 | LAMB4(3.37887); MAX(3.08802); PIAS2(2.97552); CDK4(2.97509); LAMA2(2.79088); PIAS1(2.14783); BCL2(2.08802); LAMC2(2.04298); PIK3R3(1.94002); CDK2(1.81505); ITGAV(1.7391); RXRB(1.67418); ITGA2B(1.40185); CCNE2(1.34295); COL4A1(1.29874); PIK3R5(1.26821); COL4A2(1.18146); PTK2(1.00146); FN1(0.988396); TRAF2(0.935665); LAMC3(0.836792); CDK6(0.816436); CASP9(0.79633); PIK3R2(0.785577); PIK3CB(0.676287); LAMA5(0.590045); APAF1(0.58771); E2F1(0.575825); LAMC1(0.571865); PIK3CA(0.560854); LAMB3(0.543038); BIRC2(0.538432); CYCS(0.504235); CCNE1(0.475984); ITGA3(0.406554); AKT3(0.376292); CKS1B(0.339866); CDKN2B(0.335179); CDKN1B(0.328452); LAMA4(0.311716); SKP2(0.26524); PIK3CG(0.258004); TRAF3(0.256479); NOS2(0.250046); NFKBIA(0.238702); IKBKB(0.234276); TP53(0.196363); BCL2L1(0.1384); LAMB2(0.122884); LAMA1(0.0431173); CHUK(0.0132043); FHIT(-0.0429757); PIK3R1(-0.0591231); E2F2(-0.0883306); NFKB1(-0.093743); PIAS4(-0.101555); E2F3(-0.127424); RARB(-0.171554); ITGB1(-0.270142); PIK3CD(-0.275423); RXRA(-0.308559); MYC(-0.339555); BIRC3(-0.375423); COL4A4(-0.386131); RXRG(-0.396979); CCND1(-0.401944); PTEN(-0.425435); TRAF4(-0.432422); RB1(-0.555262); LAMA3(-0.573757); LAMB1(-0.573852); ITGA6(-0.590149); PTGS2(-0.634009); AKT1(-0.66007); TRAF1(-0.751817); RELA(-0.825039); TRAF6(-0.857055); PIAS3(-0.874533); AKT2(-0.908939); TRAF5(-1.09246); ITGA2(-1.18227); |
| PID_IL27_PATHWAY            | 26 | 26 | 3.44019 | 2.91E-04 | 8.05E-03 | IL2(3.62922); TNF(3.09414); TYK2(2.44754); IL6(1.94139); IFNG(1.74523); JAK2(1.45502); IL12RB2(0.802748); EBI3(0.751677); GATA3(0.677802); IL12RB1(0.621321); STAT3(0.530038); IL17A(0.488799); JAK1(0.383449); STAT1(0.352575); IL6ST(0.282399); STAT4(0.216039); IL18(0.209739); TBX21(0.133844); IL12A(0.0685942); TGFB1(-0.0624259); STAT2(-0.174703); IL12B(-0.245281); IL27RA(-0.247082); IL27(-0.251856); STAT5A(-0.337553); IL1B(-0.388308);                                                                                                                                                                                                                                                                                                                                                                                                                                                                                                                                                                                                                                                                                                                                                                                                                                                                                                                                                                      |

REACTOME\_TOLL\_RECEPTO 118 105 3.419 3.14E-04 8.52E-03 NOD2(3.6007); AGER(3.22966); PPP2R1A(2.9049); MEF2C(2.8851);  
R\_CASCADES DUSP6(2.70143); ATF2(2.2796); TLR4(2.21756); IRAK2(2.21204); PLCG2(2.17046);  
APP(2.16022); CD14(1.8349); LY86(1.5783); RIPK1(1.24109); PPP2R5D(1.22608);  
IKBKE(1.21401); IRF3(1.16083); SIGIRR(1.08606); MAP2K7(1.06398);  
MAPK7(1.03723); IRAK3(0.989532); MAP3K1(0.950347); TLR10(0.835087);  
TLR5(0.827164); MAP2K6(0.826091); TLR1(0.810043); LGMN(0.751155);  
TAB2(0.731235); CTSS(0.725716); PPP2CB(0.662655); MAPK9(0.651725);  
MAPK3(0.624456); PIK3R4(0.622561); ZFYVE20(0.613468); TLR2(0.590802);  
TLR6(0.554005); MAPK10(0.51182); S100B(0.507374); MYD88(0.471396);  
UBE2N(0.463792); FOS(0.425231); RPS6KA1(0.417929); NFKB2(0.40473);  
PPP2CA(0.367258); RPS6KA2(0.350267); PELI2(0.325823); MAP2K4(0.306612);  
ECSIT(0.290454); CDK1(0.287431); TRAF3(0.256479); TICAM1(0.253674);  
NFKBIA(0.238702); IKBKB(0.234276); TICAM2(0.207411); DNM2(0.201089);  
MAPKAPK3(0.186524); RIPK2(0.180779); PELI3(0.17859); CTSK(0.163786);  
RPS6KA5(0.154786); MEF2A(0.137975); TIRAP(0.120268); PPP2R1B(0.113127);  
DUSP4(0.106473); MAPK1(0.0911524); S100A12(0.0440978);  
NFKBIB(0.0251617); CHUK(0.0132043); MAPK14(-0.0381522); CNPY3(-  
0.0553636); NOD1(-0.0556415); UBA52(-0.0738406); LBP(-0.11489); CTSB(-  
0.128134); RPS27A(-0.139867); MAP3K7(-0.169428); PIK3C3(-0.18695); SAA1(-  
0.193753); EEA1(-0.226783); MAPKAPK2(-0.235622); MAP2K3(-0.262194);  
DNM1(-0.286978); MAP2K1(-0.299388); CREB1(-0.315765); MAPK8(-0.317075);  
TLR9(-0.329811); HSP90B1(-0.335013); LY96(-0.341233); HMGB1(-0.352886);  
IRF7(-0.362392); UNC93B1(-0.398189); CD180(-0.415297); TAB1(-0.419768);  
TBK1(-0.422779); TMEM189-UBE2V1(-0.429019); DUSP3(-0.431729); ATF1(-  
0.474811); TLR3(-0.532126); IRAK4(-0.570726); PELI1(-0.579458); MAPK11(-  
0.702316); DUSP7(-0.805758); RELA(-0.825039); TRAF6(-0.857055); MAP2K2(-  
0.882622); JUN(-1.19243);

KEGG\_FOCAL\_ADHESION 201 191 3.38919 3.50E-04 9.30E-03 LAMB4(3.37887); ITGB5(3.23431); COL11A2(3.01016); PAK7(2.97497); TNXB(2.92941); VAV3(2.88771); LAMA2(2.79088); VWF(2.7145); BCL2(2.08802); CHAD(2.07091); LAMC2(2.04298); PIK3R3(1.94002); DOCK1(1.86176); HGF(1.85389); ITGAV(1.7391); COL3A1(1.66226); COL2A1(1.52121); ITGA4(1.44516); ITGA2B(1.40185); PPP1CA(1.39144); MET(1.37567); COL4A1(1.29874); PIK3R5(1.26821); COL4A2(1.18146); SHC4(1.16752); ITGB8(1.15984); ITGA7(1.11531); ITGA11(1.11041); PAK2(1.08157); PARVA(1.0518); VAV2(1.02671); PDGFD(1.00721); ERBB2(1.00162); PTK2(1.00146); COL6A3(0.993715); FN1(0.988396); GSK3B(0.985627); PRKCA(0.96566); ACTN2(0.962041); COL5A2(0.953369); PARVB(0.939078); SHC3(0.933645); ITGA5(0.904116); THBS4(0.88757); RAC3(0.881826); RAP1B(0.863589); LAMC3(0.836792); PDGFC(0.795654); PIK3R2(0.785577); GRB2(0.780792); COL6A2(0.757857); CTNNB1(0.700783); PIK3CB(0.676287); MAPK9(0.651725); COL1A2(0.651099); ITGB7(0.641235); MYLK3(0.640697); MAPK3(0.624456); PRKCB(0.602839); LAMA5(0.590045); ITGB4(0.578444); LAMC1(0.571865); RAC2(0.563748); PIK3CA(0.560854); PDGFB(0.554995); LAMB3(0.543038); BIRC2(0.538432); MAPK10(0.51182); RAP1A(0.493963); ARHGAP5(0.481069); VEGFC(0.4794); ITGA8(0.452552); ITGA1(0.450055); CCND3(0.449449); TNR(0.441652); MYLK2(0.422656); ITGA9(0.408583); PAK6(0.407201); ITGA3(0.406554); COL1A1(0.387913); CCND2(0.381624); AKT3(0.376292); FLT1(0.373986); ACTN4(0.360653); MYLK(0.349015); FLNC(0.338415); LAMA4(0.311716); VTN(0.303707); PARVG(0.268901); TNN(0.25853); PIK3CG(0.258004); COL5A3(0.243083); PPP1CB(0.226514); SHC2(0.204154); MYL9(0.19874); IGF1(0.180896); PDGFRB(0.167594); LAMB2(0.122884); ITGB6(0.109988); DIAPH1(0.107482); BAD(0.0974585); MAPK1(0.0911524); VEGFA(0.0807009); IGF1R(0.0730952); ACTN1(0.0709246); VASP(0.0637886); CRK(0.0519984); LAMA1(0.0431173); VEGFB(0.0396716); PXN(0.0350485); EGFR(0.0338548); VAV1(0.0121818); SHC1(-0.0234288); ACTN3(-0.034746); SOS1(-0.0432967); EGF(-0.0436186); CAV1(-0.0447534);



|                               |    |    |         |          |          |                                                                                                                                                                                                                                                                                                                                                                                                                                                                                                                                                                                                                                                                                                                                                                                                                                                                                                                                                                                                                                                                                                                                                                                                                                                                                                                                                                                                                                                                                                                                                                                                                                                                                    |
|-------------------------------|----|----|---------|----------|----------|------------------------------------------------------------------------------------------------------------------------------------------------------------------------------------------------------------------------------------------------------------------------------------------------------------------------------------------------------------------------------------------------------------------------------------------------------------------------------------------------------------------------------------------------------------------------------------------------------------------------------------------------------------------------------------------------------------------------------------------------------------------------------------------------------------------------------------------------------------------------------------------------------------------------------------------------------------------------------------------------------------------------------------------------------------------------------------------------------------------------------------------------------------------------------------------------------------------------------------------------------------------------------------------------------------------------------------------------------------------------------------------------------------------------------------------------------------------------------------------------------------------------------------------------------------------------------------------------------------------------------------------------------------------------------------|
| REACTOME_TELOMERE_MAINTENANCE | 75 | 73 | 3.38192 | 3.60E-04 | 9.35E-03 | HIST1H2BL(3.64688); HIST1H2BM(3.33787); HIST1H2AJ(3.33787); TERT(2.72184); RUVBL1(2.17911); HIST1H2BO(1.99425); HIST1H2BJ(1.65621); HIST1H4I(1.61301); HIST1H2BK(1.56533); HIST1H2BN(1.48654); HIST1H4L(1.47987); HIST1H4J(1.34966); HIST1H4K(1.34164); POLD4(1.08532); HIST1H4D(1.03022); HIST1H2BG(1.01864); HIST1H2AE(1.01701); HIST1H2AD(1.00268); HIST1H2BF(0.999573); HIST1H4E(0.996491); HIST1H2BD(0.969877); NHP2(0.967314); HIST1H4C(0.940817); HIST1H2BE(0.886607); HIST1H2BA(0.742792); HIST1H2BB(0.718367); HIST1H4B(0.706147); HIST1H2AB(0.704646); POLA2(0.690946); HIST1H2AC(0.586216); HIST1H2BC(0.578733); HIST1H4H(0.572592); HIST4H4(0.427884); TERF1(0.387512); POLD1(0.354302); H2AFZ(0.20518); RPA1(0.190989); H2AFX(0.153526); PCNA(0.107339); RFC3(0.0608275); HIST1H2BI(0.0604719); RFC5(0.0248132); POLE(0.0115741); HIST1H2BH(-0.00963075); TERF2IP(-0.0218452); RUVBL2(-0.023265); PRIM1(-0.0398877); POT1(-0.0771591); PRIM2(-0.110002); HIST1H4F(-0.133493); HIST3H2BB(-0.174075); HIST3H3(-0.174075); WRAP53(-0.189163); RFC4(-0.232394); FEN1(-0.253435); ACD(-0.292378); RPA2(-0.321658); HIST2H2AA4(-0.324904); HIST2H2AA3(-0.324904); HIST1H4A(-0.328983); POLE2(-0.386579); HIST2H4B(-0.506918); HIST2H4A(-0.506918); TERF2(-0.576335); DNA2(-0.673617); HIST2H2AC(-0.768899); HIST2H2BE(-0.768899); POLD2(-0.769259); POLD3(-0.775442); TINF2(-0.845881); RPA3(-0.861331); RFC2(-0.893328); CEL(3.6071); CYP27B1(2.88113); LIPA(2.04458); TM7SF2(1.78871); DHCR7(1.05825); DHCR24(0.900467); HSD17B7(0.507201); LSS(0.395763); MSMO1(0.123765); SOAT2(-0.0384224); SOAT1(-0.0662978); CYP51A1(-0.0756919); FDFT1(-0.188496); SQLE(-0.545738); |
| KEGG_STEROID_BIOSYNTHESIS     | 17 | 14 | 3.35528 | 3.96E-04 | 1.01E-02 |                                                                                                                                                                                                                                                                                                                                                                                                                                                                                                                                                                                                                                                                                                                                                                                                                                                                                                                                                                                                                                                                                                                                                                                                                                                                                                                                                                                                                                                                                                                                                                                                                                                                                    |

|                       |    |    |         |          |          |                                                                                                                                                                                                                                                                                                                                                                                                                                                                                                                                                                                                                                                                                                                                                                                                                                                                                                                                                                                                                                                                                                                                                                                                                                                                                                                                                                                                                                                                                                                                    |
|-----------------------|----|----|---------|----------|----------|------------------------------------------------------------------------------------------------------------------------------------------------------------------------------------------------------------------------------------------------------------------------------------------------------------------------------------------------------------------------------------------------------------------------------------------------------------------------------------------------------------------------------------------------------------------------------------------------------------------------------------------------------------------------------------------------------------------------------------------------------------------------------------------------------------------------------------------------------------------------------------------------------------------------------------------------------------------------------------------------------------------------------------------------------------------------------------------------------------------------------------------------------------------------------------------------------------------------------------------------------------------------------------------------------------------------------------------------------------------------------------------------------------------------------------------------------------------------------------------------------------------------------------|
| REACTOME_ACTIVATED_TL | 93 | 85 | 3.35082 | 4.03E-04 | 1.01E-02 | NOD2(3.6007); AGER(3.22966); PPP2R1A(2.9049); MEF2C(2.8851); DUSP6(2.70143); ATF2(2.2796); TLR4(2.21756); IRAK2(2.21204); APP(2.16022); CD14(1.8349); RIPK1(1.24109); PPP2R5D(1.22608); IKBKE(1.21401); IRF3(1.16083); SIGIRR(1.08606); MAP2K7(1.06398); MAPK7(1.03723); IRAK3(0.989532); MAP3K1(0.950347); MAP2K6(0.826091); TLR1(0.810043); TAB2(0.731235); PPP2CB(0.662655); MAPK9(0.651725); MAPK3(0.624456); TLR2(0.590802); TLR6(0.554005); MAPK10(0.51182); S100B(0.507374); MYD88(0.471396); UBE2N(0.463792); FOS(0.425231); RPS6KA1(0.417929); NFKB2(0.40473); PPP2CA(0.367258); RPS6KA2(0.350267); PELI2(0.325823); MAP2K4(0.306612); ECSIT(0.290454); CDK1(0.287431); TRAF3(0.256479); TICAM1(0.253674); NFKBIA(0.238702); IKBKB(0.234276); TICAM2(0.207411); MAPKAPK3(0.186524); RIPK2(0.180779); PELI3(0.17859); RPS6KA5(0.154786); MEF2A(0.137975); TIRAP(0.120268); PPP2R1B(0.113127); DUSP4(0.106473); MAPK1(0.0911524); S100A12(0.0440978); NFKBIB(0.0251617); CHUK(0.0132043); MAPK14(-0.0381522); NOD1(-0.0556415); UBA52(-0.0738406); RPS27A(-0.139867); MAP3K7(-0.169428); SAA1(-0.193753); MAPKAPK2(-0.235622); MAP2K3(-0.262194); MAP2K1(-0.299388); CREB1(-0.315765); MAPK8(-0.317075); LY96(-0.341233); HMGB1(-0.352886); IRF7(-0.362392); TAB1(-0.419768); TBK1(-0.422779); TMEM189-UBE2V1(-0.429019); DUSP3(-0.431729); ATF1(-0.474811); TLR3(-0.532126); IRAK4(-0.570726); PELI1(-0.579458); MAPK11(-0.702316); DUSP7(-0.805758); RELA(-0.825039); TRAF6(-0.857055); MAP2K2(-0.882622); JUN(-1.19243); |
|-----------------------|----|----|---------|----------|----------|------------------------------------------------------------------------------------------------------------------------------------------------------------------------------------------------------------------------------------------------------------------------------------------------------------------------------------------------------------------------------------------------------------------------------------------------------------------------------------------------------------------------------------------------------------------------------------------------------------------------------------------------------------------------------------------------------------------------------------------------------------------------------------------------------------------------------------------------------------------------------------------------------------------------------------------------------------------------------------------------------------------------------------------------------------------------------------------------------------------------------------------------------------------------------------------------------------------------------------------------------------------------------------------------------------------------------------------------------------------------------------------------------------------------------------------------------------------------------------------------------------------------------------|

|                                             |    |    |         |          |          |                                                                                                                                                                                                                                                                                                                                                                                                                                                                                                                                                                                                                                                                                                                                                                                                                                                                                                                                                                                                                                                                                                                                                                                                                                                                                                                                                |
|---------------------------------------------|----|----|---------|----------|----------|------------------------------------------------------------------------------------------------------------------------------------------------------------------------------------------------------------------------------------------------------------------------------------------------------------------------------------------------------------------------------------------------------------------------------------------------------------------------------------------------------------------------------------------------------------------------------------------------------------------------------------------------------------------------------------------------------------------------------------------------------------------------------------------------------------------------------------------------------------------------------------------------------------------------------------------------------------------------------------------------------------------------------------------------------------------------------------------------------------------------------------------------------------------------------------------------------------------------------------------------------------------------------------------------------------------------------------------------|
| REACTOME_INTEGRIN_CELL_SURFACE_INTERACTIONS | 79 | 77 | 3.34036 | 4.18E-04 | 1.02E-02 | RASGRP2(3.71178); ITGB5(3.23431); LAMA2(2.79088); VWF(2.7145); ICAM4(2.41265); ICAM1(2.37149); ICAM3(2.02248); ITGAV(1.7391); COL2A1(1.52121); ITGA2B(1.40185); COL4A1(1.29874); COL4A2(1.18146); ITGB8(1.15984); ITGB2(1.12695); ITGA11(1.11041); PTK2(1.00146); FN1(0.988396); APBB1P(0.975755); ITGA5(0.904116); SYK(0.90112); RAP1B(0.863589); GRB2(0.780792); FGA(0.779604); FGB(0.689535); COL1A2(0.651099); ITGB7(0.641235); LAMA5(0.590045); ITGB4(0.578444); RASGRP1(0.572251); LAMC1(0.571865); ITGAL(0.494027); RAP1A(0.493963); ITGA8(0.452552); ITGA1(0.450055); ITGA9(0.408583); ITGA3(0.406554); COL1A1(0.387913); VCAM1(0.355924); BSG(0.333155); JAM3(0.328064); VTN(0.303707); RAPGEF4(0.296728); ITGAX(0.203924); LAMB2(0.122884); ITGB6(0.109988); ITGAE(0.102453); FGG(0.0937169); CRK(0.0519984); LAMA1(0.0431173); SHC1(-0.0234288); SOS1(-0.0432967); THBS1(-0.103437); ICAM2(-0.163859); RAPGEF3(-0.164168); ITGA10(-0.205746); CSK(-0.230925); JAM2(-0.231679); SRC(-0.234395); ITGB1(-0.270142); COL4A3(-0.277999); BCAR1(-0.28773); FBN1(-0.367069); ITGAM(-0.377333); COL4A4(-0.386131); ITGB3(-0.412409); CDH1(-0.486818); IBSP(-0.508706); PTPN1(-0.537427); SPP1(-0.554361); LAMB1(-0.573852); AKT1(-0.66007); F11R(-0.683669); TNC(-0.732574); TLN1(-0.786139); AMICA1(-0.818633); PECAM1(-0.927773); ITGA2(- |
| BIOCARTA_TH1TH2_PATHWAY                     | 19 | 18 | 3.32624 | 4.40E-04 | 1.06E-02 | IL2(3.62922); HLA-DRA(3.14994); HLA-DRB1(2.76738); IL2RA(2.22875); IFNG(1.74523); IL12RB2(0.802748); IL12RB1(0.621321); IL4(0.324564); CD40(0.271072); IL18(0.209739); IFNGR2(0.105199); IL12A(0.0685942); CD86(0.049911); CD28(-0.16103); IL12B(-0.245281); IL4R(-0.365623); IFNGR1(-0.489543); IL18R1(-0.497515);                                                                                                                                                                                                                                                                                                                                                                                                                                                                                                                                                                                                                                                                                                                                                                                                                                                                                                                                                                                                                            |
| PID_IL12_STAT4_PATHWAY                      | 33 | 33 | 3.22631 | 6.27E-04 | 1.48E-02 | IL2(3.62922); HLA-DRA(3.14994); PIAS2(2.97552); HLA-DRB1(2.76738); IL2RA(2.22875); CD247(1.89209); IFNG(1.74523); PRF1(1.46483); ETV5(1.30813); MAPK9(0.651725); STAT3(0.530038); CD80(0.436654); IL13(0.436581); FOS(0.425231); PPP3R1(0.248522); STAT4(0.216039); IL18(0.209739); TBX21(0.133844); CREBBP(0.0557655); CD86(0.049911); IRF1(0.0352381); PPP3CB(0.0133119); TGFB1(-0.0624259); PPP3CA(-0.0889385); CD28(-0.16103); MAPK8(-0.317075); IL18RAP(-0.383365); CD3D(-0.407789); CD3G(-0.42788); CD4(-0.44345); IL18R1(-0.497515); CD3E(-0.776528); JUN(-1.19243);                                                                                                                                                                                                                                                                                                                                                                                                                                                                                                                                                                                                                                                                                                                                                                    |
| REACTOME_REGULATION_OF_IFNA_SIGNALING       | 24 | 24 | 3.22378 | 6.33E-04 | 1.48E-02 | IFNA1(2.57774); TYK2(2.44754); IFNA17(1.64472); SOCS1(1.64266); IFNA7(1.62659); IFNA10(1.62315); IFNA16(1.61427); IFNA14(1.46285); IFNA6(1.3785); IFNA8(0.870525); JAK1(0.383449); IFNB1(0.374848); STAT1(0.352575); IFNA21(0.297396); IFNA4(0.226331); IFNA2(0.151927); IFNAR1(0.145914); SOCS3(0.139116); IFNA5(-0.102715); STAT2(-0.174703); PTPN6(-0.471003); USP18(-0.503593); PTPN1(-0.537427); IFNAR2(-0.777482);                                                                                                                                                                                                                                                                                                                                                                                                                                                                                                                                                                                                                                                                                                                                                                                                                                                                                                                       |

|                                                                                |    |    |         |          |          |                                                                                                                                                                                                                                                                                                                                                                                                                                                                                                                                                                                                                                                                                                                                                                                                                                                                                                                                                                                                                                                                                                                                                                         |
|--------------------------------------------------------------------------------|----|----|---------|----------|----------|-------------------------------------------------------------------------------------------------------------------------------------------------------------------------------------------------------------------------------------------------------------------------------------------------------------------------------------------------------------------------------------------------------------------------------------------------------------------------------------------------------------------------------------------------------------------------------------------------------------------------------------------------------------------------------------------------------------------------------------------------------------------------------------------------------------------------------------------------------------------------------------------------------------------------------------------------------------------------------------------------------------------------------------------------------------------------------------------------------------------------------------------------------------------------|
| PID_IL2_STAT5_PATHWAY                                                          | 30 | 28 | 3.20589 | 6.73E-04 | 1.53E-02 | IL2(3.62922); LTA(3.08913); IL2RA(2.22875); BCL2(2.08802); PRF1(1.46483); FASLG(1.10083); PTPN11(0.969975); CDK6(0.816436); GRB2(0.780792); SP1(0.66075); PIK3CA(0.560854); LCK(0.533745); CCND3(0.449449); IL2RB(0.384893); JAK1(0.383449); CCND2(0.381624); IL4(0.324564); JAK3(0.210358); BCL2L1(0.1384); SHC1(-0.0234288); SOS1(-0.0432967); PIK3R1(-0.0591231); CCNA2(-0.119398); STAT5A(-0.337553); MYC(-0.339555); ELF1(-0.358688); GAB2(-0.506895); STAT5B(-0.520593);                                                                                                                                                                                                                                                                                                                                                                                                                                                                                                                                                                                                                                                                                          |
| BIOCARTA_CTLA4_PATHWAY                                                         | 21 | 19 | 3.17556 | 7.48E-04 | 1.67E-02 | IL2(3.62922); HLA-DRA(3.14994); HLA-DRB1(2.76738); CD247(1.89209); PTPN11(0.969975); GRB2(0.780792); ITK(0.578101); PIK3CA(0.560854); LCK(0.533745); CD80(0.436654); ICOSLG(0.38944); CTLA4(0.235469); CD86(0.049911); ICOS(-0.029109); PIK3R1(-0.0591231); CD28(-0.16103); CD3D(-0.407789); CD3G(-0.42788); CD3E(-0.776528);                                                                                                                                                                                                                                                                                                                                                                                                                                                                                                                                                                                                                                                                                                                                                                                                                                           |
| REACTOME_IL_6_SIGNALING                                                        | 11 | 10 | 3.15938 | 7.91E-04 | 1.73E-02 | TYK2(2.44754); IL6(1.94139); CBL(1.7632); JAK2(1.45502); STAT3(0.530038); IL6R(0.423846); JAK1(0.383449); STAT1(0.352575); IL6ST(0.282399); SOCS3(0.139116);                                                                                                                                                                                                                                                                                                                                                                                                                                                                                                                                                                                                                                                                                                                                                                                                                                                                                                                                                                                                            |
| REACTOME_NFKB_AND_MAP_KINASES_ACTIVATION_MEDIATED_BY_TLR4_SIGNALING_REPERTOIRE | 72 | 65 | 3.15915 | 7.91E-04 | 1.73E-02 | NOD2(3.6007); AGER(3.22966); PPP2R1A(2.9049); MEF2C(2.8851); DUSP6(2.70143); ATF2(2.2796); TLR4(2.21756); IRAK2(2.21204); APP(2.16022); CD14(1.8349); RIPK1(1.24109); PPP2R5D(1.22608); MAP2K7(1.06398); MAPK7(1.03723); MAP2K6(0.826091); TAB2(0.731235); PPP2CB(0.662655); MAPK9(0.651725); MAPK3(0.624456); MAPK10(0.51182); S100B(0.507374); FOS(0.425231); RPS6KA1(0.417929); NFKB2(0.40473); PPP2CA(0.367258); RPS6KA2(0.350267); MAP2K4(0.306612); CDK1(0.287431); TICAM1(0.253674); NFKBIA(0.238702); IKKB(0.234276); TICAM2(0.207411); MAPKAPK3(0.186524); RIPK2(0.180779); RPS6KA5(0.154786); MEF2A(0.137975); PPP2R1B(0.113127); DUSP4(0.106473); MAPK1(0.0911524); S100A12(0.0440978); NFKBIB(0.0251617); CHUK(0.0132043); MAPK14(-0.0381522); NOD1(-0.0556415); UBA52(-0.0738406); RPS27A(-0.139867); MAP3K7(-0.169428); SAA1(-0.193753); MAPKAPK2(-0.235622); MAP2K3(-0.262194); MAP2K1(-0.299388); CREB1(-0.315765); MAPK8(-0.317075); LY96(-0.341233); HMGB1(-0.352886); TAB1(-0.419768); DUSP3(-0.431729); ATF1(-0.474811); TLR3(-0.532126); MAPK11(-0.702316); DUSP7(-0.805758); RELA(-0.825039); TRAF6(-0.857055); MAP2K2(-0.882622); JUN(-1.19243); |
| BIOCARTA_CLASSIC_PATHWAY                                                       | 14 | 14 | 3.15544 | 8.01E-04 | 1.73E-02 | C2(3.05293); C4B(3.05007); C4A(3.05007); C9(1.18727); C6(1.1118); C1S(1.09855); C1R(0.997817); C5(0.360513); C3(0.0236471); C8A(-0.267819); C1QC(-0.444287); C7(-0.446156); C1QB(-0.447973); C1QA(-0.566865);                                                                                                                                                                                                                                                                                                                                                                                                                                                                                                                                                                                                                                                                                                                                                                                                                                                                                                                                                           |

|                                                                   |    |    |         |          |          |                                                                                                                                                                                                                                                                                                                                                                                                                                                                                                                                                                                                                                                                                                                                                                                                                                                                                                                                                                                                                                                                                                                                                                                                                                                                                                                                                                                                   |
|-------------------------------------------------------------------|----|----|---------|----------|----------|---------------------------------------------------------------------------------------------------------------------------------------------------------------------------------------------------------------------------------------------------------------------------------------------------------------------------------------------------------------------------------------------------------------------------------------------------------------------------------------------------------------------------------------------------------------------------------------------------------------------------------------------------------------------------------------------------------------------------------------------------------------------------------------------------------------------------------------------------------------------------------------------------------------------------------------------------------------------------------------------------------------------------------------------------------------------------------------------------------------------------------------------------------------------------------------------------------------------------------------------------------------------------------------------------------------------------------------------------------------------------------------------------|
| REACTOME_MEIOTIC_SYNA<br>PSIS                                     | 73 | 69 | 3.11094 | 9.32E-04 | 1.94E-02 | HIST1H2BL(3.64688); HIST1H2BM(3.33787); HIST1H2AJ(3.33787);<br>HIST1H2BO(1.99425); HIST1H2BJ(1.65621); HIST1H4I(1.61301); SMC3(1.58222);<br>HIST1H2BK(1.56533); HIST1H2BN(1.48654); HIST1H4L(1.47987);<br>HIST1H4J(1.34966); HIST1H4K(1.34164); HIST1H4D(1.03022);<br>HIST1H2BG(1.01864); HIST1H2AE(1.01701); HIST1H2AD(1.00268);<br>HIST1H2BF(0.999573); HIST1H4E(0.996491); HIST1H2BD(0.969877);<br>HIST1H4C(0.940817); HIST1H2BE(0.886607); LMNB1(0.811756);<br>RAD21(0.789717); HIST1H2BA(0.742792); HIST1H2BB(0.718367);<br>HIST1H4B(0.706147); HIST1H2AB(0.704646); STAG3(0.613512);<br>SYCP1(0.592728); HIST1H2AC(0.586216); HIST1H2BC(0.578733);<br>HIST1H4H(0.572592); HIST4H4(0.427884); HSPA2(0.427194); TERF1(0.387512);<br>TEX12(0.231152); H2AFZ(0.20518); H2AFX(0.153526); STAG1(0.105954);<br>SUN2(0.0645185); HIST1H2BI(0.0604719); SMC1B(0.0380651); HIST1H2BH(-<br>0.00963075); SYNE1(-0.0140129); TERF2IP(-0.0218452); REC8(-0.0637384);<br>POT1(-0.0771591); LMNA(-0.119259); HIST1H4F(-0.133493); HIST3H2BB(-<br>0.174075); HIST3H3(-0.174075); DIDO1(-0.254074); ACD(-0.292378);<br>HIST2H2AA4(-0.324904); HIST2H2AA3(-0.324904); HIST1H4A(-0.328983);<br>SYCP2(-0.504268); HIST2H4B(-0.506918); HIST2H4A(-0.506918); SYCP3(-<br>0.530403); TERF2(-0.576335); BRCA1(-0.685812); UBE2I(-0.745838);<br>HIST2H2AC(-0.768899); HIST2H2BE(-0.768899); TINF2(-0.845881); SYNE2(- |
| KEGG_ARRHYTHMOGENIC_<br>RIGHT_VENTRICULAR_CAR<br>DIOMYOPATHY_ARVC | 76 | 71 | 3.08715 | 1.01E-03 | 2.07E-02 | ITGB5(3.23431); LAMA2(2.79088); ITGAV(1.7391); TCF7L2(1.65051);<br>DSG2(1.56009); CTNNA2(1.44634); ITGA4(1.44516); ITGA2B(1.40185);<br>CACNA1C(1.35774); SLC8A1(1.24289); ITGB8(1.15984); ITGA7(1.11531);<br>ITGA11(1.11041); SGCD(1.09625); CTNNA3(1.05645); ACTN2(0.962041);<br>RYR2(0.929119); ITGA5(0.904116); PKP2(0.866148); CACNA2D3(0.761727);<br>TCF7(0.760612); CACNB3(0.719032); CTNNB1(0.700783); SGCB(0.698544);<br>CACNA1D(0.658074); ITGB7(0.641235); CACNA2D2(0.607578);<br>CACNA2D1(0.604575); CACNG8(0.593852); ITGB4(0.578444);<br>CACNB2(0.536932); CACNG2(0.510431); TCF7L1(0.487757); CACNG6(0.480605);<br>CACNA2D4(0.473079); ITGA8(0.452552); ITGA1(0.450055); GJA1(0.41186);<br>ITGA9(0.408583); ITGA3(0.406554); ACTN4(0.360653); DAG1(0.358283);<br>CACNB1(0.357957); CACNA1S(0.350177); LEF1(0.195327); ITGB6(0.109988);<br>CACNG7(0.0976407); CACNB4(0.0911471); ACTN1(0.0709246); DSP(0.0288629);<br>ACTN3(-0.034746); CACNG3(-0.113927); LMNA(-0.119259); CACNG5(-<br>0.182079); ITGA10(-0.205746); ACTB(-0.251508); ITGB1(-0.270142); ATP2A2(-<br>0.271585); CACNG1(-0.338721); DSC2(-0.389444); ITGB3(-0.412409); DES(-<br>0.467916); SGCG(-0.517643); CACNG4(-0.533039); ITGA6(-0.590149);<br>CTNNA1(-0.62246); JUP(-0.705482); CDH2(-0.773579); SGCA(-0.830816);<br>ITGA2(-1.18227); ACTG1(-1.26763);                                                          |

|                                                                  |    |    |         |          |          |                                                                                                                                                                                                                                                                                                                                                                                                                                                                                                                                                                                                                                                                                                                                                                                                                                                                                                                                                                                                                                                                                                                                                                                                                                                                                                                                                                                                                                                                                                                                                                                                                                                                                                                                                                                                                                                                                                                                                                                                                                                                                                                                                                                                                                                                                                                                                                                                                                                                                                                                                                          |
|------------------------------------------------------------------|----|----|---------|----------|----------|--------------------------------------------------------------------------------------------------------------------------------------------------------------------------------------------------------------------------------------------------------------------------------------------------------------------------------------------------------------------------------------------------------------------------------------------------------------------------------------------------------------------------------------------------------------------------------------------------------------------------------------------------------------------------------------------------------------------------------------------------------------------------------------------------------------------------------------------------------------------------------------------------------------------------------------------------------------------------------------------------------------------------------------------------------------------------------------------------------------------------------------------------------------------------------------------------------------------------------------------------------------------------------------------------------------------------------------------------------------------------------------------------------------------------------------------------------------------------------------------------------------------------------------------------------------------------------------------------------------------------------------------------------------------------------------------------------------------------------------------------------------------------------------------------------------------------------------------------------------------------------------------------------------------------------------------------------------------------------------------------------------------------------------------------------------------------------------------------------------------------------------------------------------------------------------------------------------------------------------------------------------------------------------------------------------------------------------------------------------------------------------------------------------------------------------------------------------------------------------------------------------------------------------------------------------------------|
| REACTOME_MYD88_MAL_C<br>ASCAD_E_INITIATED_ON_PL<br>ASMA_MEMBRANE | 83 | 75 | 3.07614 | 1.05E-03 | 2.11E-02 | NOD2(3.6007); AGER(3.22966); PPP2R1A(2.9049); MEF2C(2.8851); DUSP6(2.70143); ATF2(2.2796); TLR4(2.21756); IRAK2(2.21204); APP(2.16022); PPP2R5D(1.22608); SIGIRR(1.08606); MAP2K7(1.06398); MAPK7(1.03723); IRAK3(0.989532); MAP3K1(0.950347); MAP2K6(0.826091); TLR1(0.810043); TAB2(0.731235); PPP2CB(0.662655); MAPK9(0.651725); MAPK3(0.624456); TLR2(0.590802); TLR6(0.554005); MAPK10(0.51182); S100B(0.507374); MYD88(0.471396); UBE2N(0.463792); FOS(0.425231); RPS6KA1(0.417929); NFKB2(0.40473); PPP2CA(0.367258); RPS6KA2(0.350267); PELI2(0.325823); MAP2K4(0.306612); ECSIT(0.290454); CDK1(0.287431); NFKBIA(0.238702); IKBKB(0.234276); MAPKAPK3(0.186524); RIPK2(0.180779); PELI3(0.17859); RPS6KA5(0.154786); MEF2A(0.137975); TIRAP(0.120268); PPP2R1B(0.113127); DUSP4(0.106473); MAPK1(0.0911524); S100A12(0.0440978); NFKBIB(0.0251617); CHUK(0.0132043); MAPK14(-0.0381522); NOD1(-0.0556415); UBA52(-0.0738406); RPS27A(-0.139867); MAP3K7(-0.169428); SAA1(-0.193753); MAPKAPK2(-0.235622); MAP2K3(-0.262194); MAP2K1(-0.299388); CREB1(-0.315765); MAPK8(-0.317075); LY96(-0.341233); HMGB1(-0.352886); TAB1(-0.419768); TMEM189-UBE2V1(-0.429019); DUSP3(-0.431729); ATF1(-0.474811); IRAK4(-0.570726); PELI1(-0.579458); MAPK11(-0.702316); DUSP7(-0.805758); RELA(-0.825039); TRAF6(-0.857055); MAP2K2(-0.857055); MAP2K2(-0.857055); CFB(3.19009); C2(3.05293); C4B(3.05007); C4A(3.05007); C9(1.18727); C6(1.1118); C1S(1.09855); C1R(0.997817); C5(0.360513); MBL2(0.181386); C3(0.0236471); MASP1(-0.257198); C8A(-0.267819); C1QC(-0.444287); C7(-0.446156); C1QB(-0.447973); CFD(-0.488568); C1QA(-0.566865); MASP2(-0.566865); UPP1(3.59707); UGT1A3(3.33043); UGT1A4(3.31764); UGT1A5(3.30731); UGT1A6(3.26371); UGT1A7(3.2518); UGT1A9(3.23992); UGT1A10(3.20575); UGT1A8(3.17338); GMPS(2.07333); DPYS(1.50282); UMPS(1.40277); CYP3A43(1.22803); UGT2B4(1.16375); IMPDH1(0.876473); UCKL1(0.505807); UCK2(0.486573); UGT2B10(0.472469); UGT2B15(0.245708); CYP2A13(0.147201); TK1(0.128002); NAT2(0.0579529); DPYD(-0.0485864); CDA(-0.0690073); TK2(-0.0909932); GUSB(-0.133412); XDH(-0.162448); UPP2(-0.229098); IMPDH2(-0.245499); UGT2B11(-0.251929); ITPA(-0.349925); UCK1(-0.365966); CYP3A4(-0.428428); TPMT(-0.530326); UGT2A3(-0.552256); CYP2A6(-0.57746); UPB1(-0.588138); TYMP(-0.589054); UGT1A1(-0.592548); NAT1(-0.637084); UGT2A1(-0.654466); CYP3A5(-0.745416); CES5A(-0.853117); CES2(-0.860293); CYP2A7(-0.872636); UGT2B17(-0.890233); UGT2B28(-1.00335); UGT2B7(-1.01467); CES1(-1.08522); CYP3A7(-1.1341); |
| BIOCARTA_COMP_PATHW<br>AY                                        | 19 | 19 | 3.05016 | 1.14E-03 | 2.26E-02 | CFB(3.19009); C2(3.05293); C4B(3.05007); C4A(3.05007); C9(1.18727); C6(1.1118); C1S(1.09855); C1R(0.997817); C5(0.360513); MBL2(0.181386); C3(0.0236471); MASP1(-0.257198); C8A(-0.267819); C1QC(-0.444287); C7(-0.446156); C1QB(-0.447973); CFD(-0.488568); C1QA(-0.566865); MASP2(-0.566865); UPP1(3.59707); UGT1A3(3.33043); UGT1A4(3.31764); UGT1A5(3.30731); UGT1A6(3.26371); UGT1A7(3.2518); UGT1A9(3.23992); UGT1A10(3.20575); UGT1A8(3.17338); GMPS(2.07333); DPYS(1.50282); UMPS(1.40277); CYP3A43(1.22803); UGT2B4(1.16375); IMPDH1(0.876473); UCKL1(0.505807); UCK2(0.486573); UGT2B10(0.472469); UGT2B15(0.245708); CYP2A13(0.147201); TK1(0.128002); NAT2(0.0579529); DPYD(-0.0485864); CDA(-0.0690073); TK2(-0.0909932); GUSB(-0.133412); XDH(-0.162448); UPP2(-0.229098); IMPDH2(-0.245499); UGT2B11(-0.251929); ITPA(-0.349925); UCK1(-0.365966); CYP3A4(-0.428428); TPMT(-0.530326); UGT2A3(-0.552256); CYP2A6(-0.57746); UPB1(-0.588138); TYMP(-0.589054); UGT1A1(-0.592548); NAT1(-0.637084); UGT2A1(-0.654466); CYP3A5(-0.745416); CES5A(-0.853117); CES2(-0.860293); CYP2A7(-0.872636); UGT2B17(-0.890233); UGT2B28(-1.00335); UGT2B7(-1.01467); CES1(-1.08522); CYP3A7(-1.1341);                                                                                                                                                                                                                                                                                                                                                                                                                                                                                                                                                                                                                                                                                                                                                                                                                                                                                                                                                                                                                                                                                                                                                                                                                                                                                                                                                                   |
| KEGG_DRUG_METABOLISM<br>_OTHER_ENZYMES                           | 51 | 50 | 3.02851 | 1.23E-03 | 2.39E-02 | UPP1(3.59707); UGT1A3(3.33043); UGT1A4(3.31764); UGT1A5(3.30731); UGT1A6(3.26371); UGT1A7(3.2518); UGT1A9(3.23992); UGT1A10(3.20575); UGT1A8(3.17338); GMPS(2.07333); DPYS(1.50282); UMPS(1.40277); CYP3A43(1.22803); UGT2B4(1.16375); IMPDH1(0.876473); UCKL1(0.505807); UCK2(0.486573); UGT2B10(0.472469); UGT2B15(0.245708); CYP2A13(0.147201); TK1(0.128002); NAT2(0.0579529); DPYD(-0.0485864); CDA(-0.0690073); TK2(-0.0909932); GUSB(-0.133412); XDH(-0.162448); UPP2(-0.229098); IMPDH2(-0.245499); UGT2B11(-0.251929); ITPA(-0.349925); UCK1(-0.365966); CYP3A4(-0.428428); TPMT(-0.530326); UGT2A3(-0.552256); CYP2A6(-0.57746); UPB1(-0.588138); TYMP(-0.589054); UGT1A1(-0.592548); NAT1(-0.637084); UGT2A1(-0.654466); CYP3A5(-0.745416); CES5A(-0.853117); CES2(-0.860293); CYP2A7(-0.872636); UGT2B17(-0.890233); UGT2B28(-1.00335); UGT2B7(-1.01467); CES1(-1.08522); CYP3A7(-1.1341);                                                                                                                                                                                                                                                                                                                                                                                                                                                                                                                                                                                                                                                                                                                                                                                                                                                                                                                                                                                                                                                                                                                                                                                                                                                                                                                                                                                                                                                                                                                                                                                                                                                                   |

|                                           |    |    |         |          |          |                                                                                                                                                                                                                                                                                                                                                                                                                                                                                                                                                                                                                                                                                                                                                                                                                                                                                                                                                                                                                                                                                                                      |
|-------------------------------------------|----|----|---------|----------|----------|----------------------------------------------------------------------------------------------------------------------------------------------------------------------------------------------------------------------------------------------------------------------------------------------------------------------------------------------------------------------------------------------------------------------------------------------------------------------------------------------------------------------------------------------------------------------------------------------------------------------------------------------------------------------------------------------------------------------------------------------------------------------------------------------------------------------------------------------------------------------------------------------------------------------------------------------------------------------------------------------------------------------------------------------------------------------------------------------------------------------|
| KEGG_COMPLEMENT_AND_COAGULATION_CASCADES  | 69 | 67 | 3.02256 | 1.25E-03 | 2.40E-02 | CFB(3.19009); C2(3.05293); C4B(3.05007); C4A(3.05007); VWF(2.7145); SERPINA1(2.37315); C4BPB(1.99063); C4BPA(1.88772); C3AR1(1.62246); CPB2(1.33867); F11(1.30132); KLKB1(1.26289); C9(1.18727); C6(1.1118); CR2(1.11087); SERPING1(1.10671); C1S(1.09855); F13A1(1.03341); C8G(0.999052); C1R(0.997817); CR1(0.912186); THBD(0.799068); FGA(0.779604); CFH(0.698171); F13B(0.689741); FGB(0.689535); PLAT(0.51634); PROS1(0.401499); SERPINE1(0.387677); C5(0.360513); SERPINF2(0.31698); CFI(0.305955); CD59(0.28975); PLG(0.232701); MBL2(0.181386); FGG(0.0937169); F12(0.0915093); F3(0.074598); C3(0.0236471); CD46(-0.029984); TFPI(-0.0406789); F5(-0.0554631); PROC(-0.0647562); BDKRB2(-0.227858); A2M(-0.242414); MASP1(-0.257198); C8A(-0.267819); PLAU(-0.295107); F2R(-0.340584); SERPIND1(-0.365786); CD55(-0.388429); C1QC(-0.444287); C7(-0.446156); C1QB(-0.447973); CFD(-0.488568); PLAUR(-0.510077); F10(-0.55951); C1QA(-0.566865); F7(-0.577182); BDKRB1(-0.633675); MASP2(-0.73567); C5AR1(-0.770892); SERPINC1(-0.801832); SERPINA5(-0.923336); KNG1(-1.08208); C8B(-1.16298); F2(-1.22397); |
| KEGG_PORPHYRIN_AND_CHLOROPHYLL_METABOLISM | 41 | 39 | 3.01375 | 1.29E-03 | 2.44E-02 | UGT1A3(3.33043); UGT1A4(3.31764); UGT1A5(3.30731); UGT1A6(3.26371); UGT1A7(3.2518); UGT1A9(3.23992); UGT1A10(3.20575); UGT1A8(3.17338); FTH1(1.57067); UGT2B4(1.16375); UROS(0.838807); UGT2B10(0.472469); UGT2B15(0.245708); ALAS1(0.244068); HMBS(0.121711); CPOX(0.097911); HMOX2(0.0605464); COX10(0.0305192); FECH(0.0275487); HMOX1(-0.0910606); CP(-0.118997); GUSB(-0.133412); ALAD(-0.159671); BLVRB(-0.203126); COX15(-0.224787); UGT2B11(-0.251929); EPRS(-0.27776); UROD(-0.283584); BLVRA(-0.369675); UGT2A3(-0.552256); FTMT(-0.590125); UGT1A1(-0.592548); UGT2A1(-0.654466); PPOX(-0.669952); EARS2(-0.797888); UGT2B17(-0.890233); UGT2B28(-1.00335); UGT2B7(-1.01467); MMAB(-                                                                                                                                                                                                                                                                                                                                                                                                                      |
| REACTOME_NOTCH_HLH_TRANSCRIPTION_PATHWAY  | 13 | 11 | 3.0052  | 1.33E-03 | 2.47E-02 | NOTCH4(3.11745); MAML3(2.08436); MAML2(1.38719); MAML1(1.20101); NOTCH3(0.659362); RBPJ(0.455348); KAT2B(0.415337); KAT2A(0.341586); SNW1(0.186749); CREBBP(0.0557655); NOTCH2(-0.0795785);                                                                                                                                                                                                                                                                                                                                                                                                                                                                                                                                                                                                                                                                                                                                                                                                                                                                                                                          |
| BIOCARTA_LECTIN_PATHWAY                   | 12 | 12 | 3.00011 | 1.35E-03 | 2.47E-02 | C2(3.05293); C4B(3.05007); C4A(3.05007); C9(1.18727); C6(1.1118); C5(0.360513); MBL2(0.181386); C3(0.0236471); MASP1(-0.257198); C8A(-0.267819); C7(-0.446156); MASP2(-0.73567);                                                                                                                                                                                                                                                                                                                                                                                                                                                                                                                                                                                                                                                                                                                                                                                                                                                                                                                                     |
| BIOCARTA_IL5_PATHWAY                      | 10 | 10 | 2.97629 | 1.46E-03 | 2.64E-02 | HLA-DRA(3.14994); HLA-DRB1(2.76738); IL6(1.94139); CCR3(1.27997); IL5RA(0.870477); IL4(0.324564); IL5(0.0659333); CCL11(-0.33936); IL1B(-0.388308); CD4(-0.44345);                                                                                                                                                                                                                                                                                                                                                                                                                                                                                                                                                                                                                                                                                                                                                                                                                                                                                                                                                   |

KEGG\_ENDOCYTOSIS

183 175 2.95273 1.57E-03 2.81E-02 EPN3(3.49475); HSPA1B(3.36842); HSPA1A(3.3411); HSPA1L(3.30303); HLA-E(3.27708); HLA-G(3.2749); HLA-A(3.02312); HLA-C(2.98835); HLA-B(2.95626); HLA-F(2.83254); AGAP2(2.76106); PSD3(2.53019); IL2RA(2.22875); VPS37A(2.19225); CHMP1B(2.08789); VTA1(1.95172); RAB11FIP1(1.93734); ERBB4(1.77497); CBL(1.7632); SH3GL3(1.69492); RAB5B(1.67979); EHD3(1.66272); PIP5K1B(1.64414); RAB31(1.57246); ADRBK1(1.54173); CLTC(1.49085); ERBB3(1.48586); KIT(1.43363); DNM1L(1.43179); STAMBP(1.39615); MET(1.37567); ARAP2(1.32902); PSD(1.27342); SH3GL1(1.21657); FGFR3(1.18104); ITCH(1.105); CSF1R(1.08425); EHD4(0.924562); RNF41(0.872899); HSPA6(0.860512); CHMP4B(0.846282); CHMP4C(0.729571); ZFYVE20(0.613468); DNAJC6(0.59409); ARRB2(0.592679); PSD4(0.550868); DNM3(0.526387); CXCR2(0.512652); ARRB1(0.508892); RAB11B(0.501736); RAB11FIP4(0.476062); SMURF1(0.466277); PARD3(0.450271); CBLB(0.438177); EPN2(0.431787); HSPA2(0.427194); EHD1(0.400189); CBLC(0.393777); PDCD6IP(0.389071); IL2RB(0.384893); ACAP2(0.383005); RAB22A(0.382696); SMAP2(0.374535); FLT1(0.373986); NTRK1(0.356589); IQSEC1(0.354008); RABEP1(0.3455); ACAP1(0.309997); PSD2(0.307305); CCR5(0.281147); EHD2(0.278969); FGFR2(0.265879); RAB5C(0.261561); VPS45(0.236123); VPS36(0.22458); CHMP6(0.217566); DNM2(0.201089); PLD2(0.195319); PIP5K1A(0.177782); CHMP2B(0.172062); GIT1(0.137385); CXCR1(0.134491); HGS(0.132542); NEDD4L(0.0825246); IGF1R(0.0730952); EGFR(0.0338548); GRK6(0.0236085); PARD6B(0.0177364); USP8(0.0167321); ADRB2(0.0166619); RET(-0.00418331); ARFGAP3(-0.0135953); SMAP1(-0.0304692); HSPA8(-0.0426388); EGF(-0.0436186); AP2B1(-0.0521383); MDM2(-0.0625731); CHMP4A(-0.0637384); VPS28(-0.0953078); ARAP1(-0.0956611); CDC42(-0.105947); AP2M1(-0.129506); FGFR4(-0.142673); ARAP3(-0.169696); SMURF2(-0.179539); IQSEC3(-0.202306); GRK5(-0.204118); CLTCL1(-0.209762); STAM(-0.210806); VPS37B(-0.215536); EEA1(-0.226783); VPS37D(-0.22997); SRC(-0.234395); CHMP2A(-0.268341);



|                                                          |    |    |         |          |          |                                                                                                                                                                                                                                                                                                                                                                                                                                                                                                                                                                                                                                                                                                                                                                                                                                                                                                                                                                                                                                                                                                                                                                                                                                                                                                                                                                              |
|----------------------------------------------------------|----|----|---------|----------|----------|------------------------------------------------------------------------------------------------------------------------------------------------------------------------------------------------------------------------------------------------------------------------------------------------------------------------------------------------------------------------------------------------------------------------------------------------------------------------------------------------------------------------------------------------------------------------------------------------------------------------------------------------------------------------------------------------------------------------------------------------------------------------------------------------------------------------------------------------------------------------------------------------------------------------------------------------------------------------------------------------------------------------------------------------------------------------------------------------------------------------------------------------------------------------------------------------------------------------------------------------------------------------------------------------------------------------------------------------------------------------------|
| REACTOME_COSTIMULATI<br>ON_BY_THE_CD28_FAMILY            | 63 | 61 | 2.90654 | 1.83E-03 | 3.21E-02 | HLA-DRB5(4.11028); HLA-DQA2(3.16347); HLA-DPB1(3.03922); HLA-DPA1(3.0355); HLA-DQA1(2.94591); PPP2R1A(2.9049); HLA-DRB1(2.76738); PPP2R5B(2.12399); PIK3R3(1.94002); CD247(1.89209); LYN(1.55095); MAP3K14(1.30259); PPP2R5D(1.22608); PAK2(1.08157); PIK3R2(0.785577); GRB2(0.780792); HLA-DRB3(0.760622); TNFRSF14(0.702753); PPP2CB(0.662655); PIK3CA(0.560854); LCK(0.533745); MAPKAP1(0.502031); TRIB3(0.473144); CD80(0.436654); ICOSLG(0.38944); AKT3(0.376292); YES1(0.370569); PPP2CA(0.367258); BTLA(0.250398); CTLA4(0.235469); PDCD1(0.148295); PPP2R1B(0.113127); CD86(0.049911); VAV1(0.0121818); ICOS(-0.029109); PIK3R1(-0.0591231); PDCD1LG2(-0.0638366); CDC42(-0.105947); CD28(-0.16103); CD274(-0.205013); CSK(-0.230925); SRC(-0.234395); FYN(-0.241479); PAK1(-0.283972); CD3D(-0.407789); CD3G(-0.42788); CD4(-0.44345); PTPN6(-0.471003); GRAP2(-0.483501); THEM4(-0.55354); AKT1(-0.66007); CD3E(-0.776528); PPP2R5A(-0.7959); PPP2R5C(-0.842159); RAC1(-0.871829); AKT2(-0.908939); MLST8(-0.913597); MTOR(-0.981332); RICTOR(-0.985729); MAP3K8(-1.04348); PPP2R5E(-1.52015);                                                                                                                                                                                                                                                                     |
| REACTOME_DOPAMINE_NE<br>UROTRANSMITTER_RELEAS<br>E_CYCLE | 11 | 10 | 2.90132 | 1.86E-03 | 3.22E-02 | SLC18A2(3.48067); RIMS1(2.42176); RAB3A(2.30724); SNAP25(1.18557); STX1A(0.487482); STXBP1(0.262765); SYN3(-0.167532); SYT1(-0.183801); VAMP2(-0.36338); SYN2(-0.402865);                                                                                                                                                                                                                                                                                                                                                                                                                                                                                                                                                                                                                                                                                                                                                                                                                                                                                                                                                                                                                                                                                                                                                                                                    |
| PID_CD8_TCR_DOWNSTRE<br>AM_PATHWAY                       | 65 | 63 | 2.89177 | 1.92E-03 | 3.27E-02 | IL2(3.62922); TNF(3.09414); HLA-A(3.02312); IFNA1(2.57774); IL2RA(2.22875); CD247(1.89209); IFNG(1.74523); IFNA17(1.64472); IFNA7(1.62659); IFNA10(1.62315); IFNA16(1.61427); PRF1(1.46483); IFNA14(1.46285); IFNA6(1.3785); KRAS(1.22269); FASLG(1.10083); PRKCA(0.96566); NFATC1(0.889869); IFNA8(0.870525); FOSL1(0.82791); PTPN7(0.742338); MAPK9(0.651725); MAPK3(0.624456); PRKCB(0.602839); FOS(0.425231); NRAS(0.40874); IL2RB(0.384893); IFNA21(0.297396); PPP3R1(0.248522); IFNA4(0.226331); STAT4(0.216039); PRKCE(0.201093); IFNA2(0.151927); IFNAR1(0.145914); MAPK1(0.0911524); EOMES(0.0485399); NFATC2(0.0310983); PPP3CB(0.0133119); PPP3CA(-0.0889385); IFNA5(-0.102715); JUNB(-0.106947); GZMB(-0.268581); MAP2K1(-0.299388); TNFRSF9(-0.311537); HRAS(-0.315664); MAPK8(-0.317075); EGR4(-0.341449); BRAF(-0.342713); CD8A(-0.391305); CD3D(-0.407789); CD3G(-0.42788); CD8B(-0.443911); B2M(-0.476766); RAF1(-0.578068); EGR1(-0.604089); TNFRSF18(-0.657542); PRKCQ(-0.709571); CD3E(-0.776528); IFNAR2(-0.777482); MAP2K2(-0.882622); NFATC3(-1.09619); TNFRSF4(-1.11838); JUN(-1.11838); TNF(3.09414); BCL2(2.08802); DAXX(1.59038); FASLG(1.10083); HSPB1(0.971653); FAS(0.923795); CASP9(0.79633); APAF1(0.58771); CYCS(0.504235); IL1A(0.402186); MAPKAPK3(0.186524); HSPB2(-0.0648927); ACTA1(-0.182492); MAPKAPK2(-0.235622); CASP3(-0.541075); |
| BIOCARTA_HSP27_PATHW<br>AY                               | 15 | 15 | 2.84589 | 2.21E-03 | 3.73E-02 | TNF(3.09414); BCL2(2.08802); DAXX(1.59038); FASLG(1.10083); HSPB1(0.971653); FAS(0.923795); CASP9(0.79633); APAF1(0.58771); CYCS(0.504235); IL1A(0.402186); MAPKAPK3(0.186524); HSPB2(-0.0648927); ACTA1(-0.182492); MAPKAPK2(-0.235622); CASP3(-0.541075);                                                                                                                                                                                                                                                                                                                                                                                                                                                                                                                                                                                                                                                                                                                                                                                                                                                                                                                                                                                                                                                                                                                  |

|                                     |     |     |        |          |          |                                                                                                                                                                                                                                                                                                                                                                                                                                                                                                                                                                                                                                                                                                                                                                                                                                                                                                                                                                                                                                                                                                                                                                                                                                                                                                                                                                                                                                                                                                                                                                                                                                                                                                                                                                                                                                                                                                                                                                                                                                                                                                                                                                                                                                                                                                                                                                                                                                                                                                                                                                                                                                                                                                                          |
|-------------------------------------|-----|-----|--------|----------|----------|--------------------------------------------------------------------------------------------------------------------------------------------------------------------------------------------------------------------------------------------------------------------------------------------------------------------------------------------------------------------------------------------------------------------------------------------------------------------------------------------------------------------------------------------------------------------------------------------------------------------------------------------------------------------------------------------------------------------------------------------------------------------------------------------------------------------------------------------------------------------------------------------------------------------------------------------------------------------------------------------------------------------------------------------------------------------------------------------------------------------------------------------------------------------------------------------------------------------------------------------------------------------------------------------------------------------------------------------------------------------------------------------------------------------------------------------------------------------------------------------------------------------------------------------------------------------------------------------------------------------------------------------------------------------------------------------------------------------------------------------------------------------------------------------------------------------------------------------------------------------------------------------------------------------------------------------------------------------------------------------------------------------------------------------------------------------------------------------------------------------------------------------------------------------------------------------------------------------------------------------------------------------------------------------------------------------------------------------------------------------------------------------------------------------------------------------------------------------------------------------------------------------------------------------------------------------------------------------------------------------------------------------------------------------------------------------------------------------------|
| KEGG_CALCIIUM_SIGNALIN<br>G_PATHWAY | 178 | 164 | 2.8205 | 2.40E-03 | 3.99E-02 | CACNA1G(3.37214); NOS1(3.25495); SLC25A31(3.02585); CD38(2.67163); PDE1B(2.66222); PDE1A(2.21077); PLCG2(2.17046); SLC8A2(2.14992); GRM5(2.01769); P2RX6(1.95229); ITPR2(1.90744); GNAL(1.8401); ERBB4(1.77497); PLCG1(1.65209); ITPR3(1.51267); ERBB3(1.48586); ADCY3(1.44529); NTSR1(1.42226); GNA14(1.38188); CACNA1C(1.35774); RYR1(1.28626); CAMK2A(1.24873); SLC8A1(1.24289); HTR2A(1.24068); TACR1(1.21634); CACNA1A(1.11993); PHKG1(1.07296); ERBB2(1.00162); BST1(0.997448); RYR3(0.967599); PRKCA(0.96566); RYR2(0.929119); CCKAR(0.886163); ADCY9(0.803191); HTR6(0.799644); SLC8A3(0.771889); PHKG2(0.763534); PHKB(0.755004); CACNA1D(0.658074); CCKBR(0.652206); MYLK3(0.640697); NOS3(0.632825); CHRM1(0.61819); DRD1(0.614311); AVPR1A(0.606704); PRKCB(0.602839); ADORA2B(0.592182); ADCY2(0.56302); VDAC2(0.542544); CALML5(0.514355); CALM2(0.485411); PLCB2(0.482487); PRKACG(0.482475); VDAC3(0.481877); CHRM3(0.481802); AGTR1(0.460707); EDNRA(0.448593); ITPKB(0.429545); MYLK2(0.422656); CAMK2D(0.366921); PTGER3(0.357971); CACNA1S(0.350177); MYLK(0.349015); CALM3(0.33634); HRH2(0.32203); CALML3(0.314376); ITPKA(0.282421); ATP2A3(0.277376); GRIN2A(0.262373); HTR7(0.262111); P2RX5(0.261331); NOS2(0.250046); PPP3R1(0.248522); EDNRB(0.226562); CAMK2B(0.223172); CAMK4(0.213425); CHP2(0.195824); CACNA1I(0.189185); PLCD3(0.188656); P2RX7(0.179832); P2RX1(0.177262); PDGFRB(0.167594); GRM1(0.143722); GRIN2C(0.107225); PPP3CC(0.104707); GNA15(0.102663); PPP3R2(0.0651284); CACNA1H(0.0636771); PLCD1(0.0618419); PLCE1(0.0547158); VDAC1(0.0454852); EGFR(0.0338548); ADRA1D(0.0259081); PLCB3(0.0203974); ADRB2(0.0166619); PLCB4(0.0140462); PPP3CB(0.0133119); GNAQ(-0.00333743); PTK2B(-0.0251027); PTGER1(-0.055975); TACR2(-0.0562026); PRKCG(-0.057636); ITPR1(-0.0580238); GRIN1(-0.0727883); ATP2B2(-0.0817923); PPP3CA(-0.0889385); TNNC1(-0.107648); TRPC1(-0.116517); PRKACB(-0.117677); GNAS(-0.118635); ADRA1B(-0.120437); PLCZ1(-0.122911); DDIT3(3.16442); MAX(3.08802); MEF2C(2.8851); ATF2(2.2796); TGFB2(2.02181); DAXX(1.59038); RIPK1(1.24109); TGFB3(1.10517); PLA2G4A(1.05636); HSPB1(0.971653); MAP3K1(0.950347); TRAF2(0.935665); MAP2K6(0.826091); GRB2(0.780792); MEF2D(0.616393); STAT1(0.352575); MAP2K4(0.306612); MAP3K5(0.293608); MAP3K9(0.283308); RPS6KA5(0.154786); MEF2A(0.137975); SHC1(-0.0234288); MAPK14(-0.0381522); TGFB1(-0.0624259); HSPB2(-0.0648927); CDC42(-0.105947); MAP3K7(-0.169428); MAPKAPK5(-0.231245); MAPKAPK2(-0.235622); MEF2BNB-MEF2B(-0.246197); MKNK1(-0.278163); HRAS(-0.315664); CREB1(-0.315765); MYC(-0.339555); HMGN1(-0.349208); TRADD(-0.470001); RAPGEF2(-0.602411); TGFB1(-0.64572); RAC1(-0.871829); |
| BIOCARTA_P38MAPK_PATH<br>WAY        | 40  | 39  | 2.7927 | 2.61E-03 | 4.29E-02 |                                                                                                                                                                                                                                                                                                                                                                                                                                                                                                                                                                                                                                                                                                                                                                                                                                                                                                                                                                                                                                                                                                                                                                                                                                                                                                                                                                                                                                                                                                                                                                                                                                                                                                                                                                                                                                                                                                                                                                                                                                                                                                                                                                                                                                                                                                                                                                                                                                                                                                                                                                                                                                                                                                                          |

|                                    |    |    |         |          |          |                                                                                                                                                                                                                                                                                                                                                                                                                                                                                                                                                                                                                                                                                                                                                                                                                                                                                                                                                                                                                                 |
|------------------------------------|----|----|---------|----------|----------|---------------------------------------------------------------------------------------------------------------------------------------------------------------------------------------------------------------------------------------------------------------------------------------------------------------------------------------------------------------------------------------------------------------------------------------------------------------------------------------------------------------------------------------------------------------------------------------------------------------------------------------------------------------------------------------------------------------------------------------------------------------------------------------------------------------------------------------------------------------------------------------------------------------------------------------------------------------------------------------------------------------------------------|
| KEGG_STARCH_AND_SUCROSE_METABOLISM | 52 | 52 | 2.75326 | 2.95E-03 | 4.78E-02 | UGT1A3(3.33043); UGT1A4(3.31764); UGT1A5(3.30731); UGT1A6(3.26371); UGT1A7(3.2518); UGT1A9(3.23992); UGT1A10(3.20575); UGT1A8(3.17338); PYGM(1.70935); GPI(1.47862); UGT2B4(1.16375); GBE1(1.14801); UGDH(0.84563); PGM2L1(0.761798); GYS2(0.615974); HK1(0.57591); UGT2B10(0.472469); AGL(0.367059); GBA3(0.342389); PGM2(0.329183); UGT2B15(0.245708); ENPP3(0.143932); HK3(0.135247); GAA(0.0826734); G6PC(0.067754); ENPP1(0.0438801); PGM1(0.0251544); AMY2A(-0.0206304); GUSB(-0.133412); PYGL(-0.14447); GANC(-0.23518); UGT2B11(-0.251929); GYS1(-0.254847); UXS1(-0.282069); AMY2B(-0.294828); HK2(-0.423863); G6PC2(-0.433069); UGP2(-0.494939); UGT2A3(-0.552256); TREH(-0.580362); UGT1A1(-0.592548); GCK(-0.601516); PYGB(-0.617204); UGT2A1(-0.654466); AMY1C(-0.660479); AMY1B(-0.660479); AMY1A(-0.660479); SI(-0.810097); UGT2B17(-0.890233); UGT2B28(-1.00335); UGT2B7(-1.01467); MGAM(-                                                                                                                      |
| BIOCARTA_CTL_PATHWAY               | 15 | 13 | 2.75219 | 2.96E-03 | 4.78E-02 | HLA-A(3.02312); ICAM1(2.37149); CD247(1.89209); PRF1(1.46483); ITGB2(1.12695); FASLG(1.10083); FAS(0.923795); ITGAL(0.494027); GZMB(-0.268581); CD3D(-0.407789); CD3G(-0.42788); B2M(-0.476766); CD3E(-0.776528);                                                                                                                                                                                                                                                                                                                                                                                                                                                                                                                                                                                                                                                                                                                                                                                                               |
| REACTOME_COLLAGEN_FORMATION        | 58 | 54 | 2.74133 | 3.06E-03 | 4.83E-02 | LEPREL1(3.12206); COL11A2(3.01016); COL3A1(1.66226); COL9A1(1.61187); COL8A2(1.58523); COL10A1(1.564); COL2A1(1.52121); COL15A1(1.47145); TLL2(1.30996); COL4A1(1.29874); COL4A2(1.18146); ADAMTS14(1.17361); BMP1(1.12493); COL22A1(1.1108); COL6A3(0.993715); COL5A2(0.953369); PCOLCE2(0.933646); COL24A1(0.763925); COL6A2(0.757857); COL25A1(0.733148); COL1A2(0.651099); ADAMTS2(0.539826); PLOD1(0.495339); COL27A1(0.46456); COL1A1(0.387913); COL13A1(0.365421); PLOD2(0.275233); COL5A3(0.243083); TLL1(0.211382); PCOLCE(0.160321); COL23A1(0.148729); PLOD3(0.134993); COL19A1(0.0408636); SERPINH1(0.0126306); COL9A2(-0.000692347); COL11A1(-0.0467516); COL6A1(-0.113865); COL5A1(-0.240827); PPIB(-0.256324); COL4A3(-0.277999); P4HB(-0.305894); COL16A1(-0.306269); ADAMTS3(-0.336679); COL17A1(-0.353986); COL4A4(-0.386131); CRTAP(-0.391165); COL7A1(-0.423746); LEPREL2(-0.494193); COL14A1(-0.538819); COL9A3(-0.540119); COL12A1(-0.653815); COL21A1(-0.741019); COL8A1(-0.814646); COL28A1(-0.940121); |
| REACTOME_COMPLEMENT_CASCADE        | 32 | 29 | 2.73513 | 3.12E-03 | 4.86E-02 | CFB(3.19009); C2(3.05293); C4A(3.05007); C4BPB(1.99063); C4BPA(1.88772); C9(1.18727); C6(1.1118); C1S(1.09855); C8G(0.999052); CR1(0.912186); CFH(0.698171); CFHR3(0.493245); CRP(0.414107); PROS1(0.401499); C5(0.360513); CFI(0.305955); MBL2(0.181386); C3(0.0236471); CD46(-0.029984); MASP1(-0.257198); C8A(-0.267819); CD55(-0.388429); C1QC(-0.444287); C7(-0.446156); C1QB(-0.447973); CFD(-0.488568); C1QA(-0.566865); MASP2(-0.73567); C8B(-1.16298);                                                                                                                                                                                                                                                                                                                                                                                                                                                                                                                                                                 |

REACTOME\_IL\_RECEPTOR\_S 27 24 2.72266 3.24E-03 4.98E-02 IL2(3.62922); INPPL1(2.38347); IL2RA(2.22875); PIK3R3(1.94002); JAK2(1.45502);  
HC\_SIGNALING IL5RA(0.870477); PIK3R2(0.785577); GRB2(0.780792); PIK3CB(0.676287);  
PIK3CA(0.560854); IL2RB(0.384893); JAK1(0.383449); CSF2RB(0.308307);  
JAK3(0.210358); IL5(0.0659333); SHC1(-0.0234288); SOS1(-0.0432967);  
PIK3R1(-0.0591231); PIK3CD(-0.275423); CSF2(-0.305327); HRAS(-0.315664);  
IL3(-0.347172); PTPN6(-0.471003); GAB2(-0.506895);

---
